# Supplementary material for: Mechanics and dynamics of translocating MreB filaments on curved membranes
Source: eLife journal article supplement (doi:10.7554/elife.40472), 2019-02-18

**a**

Polar translocation

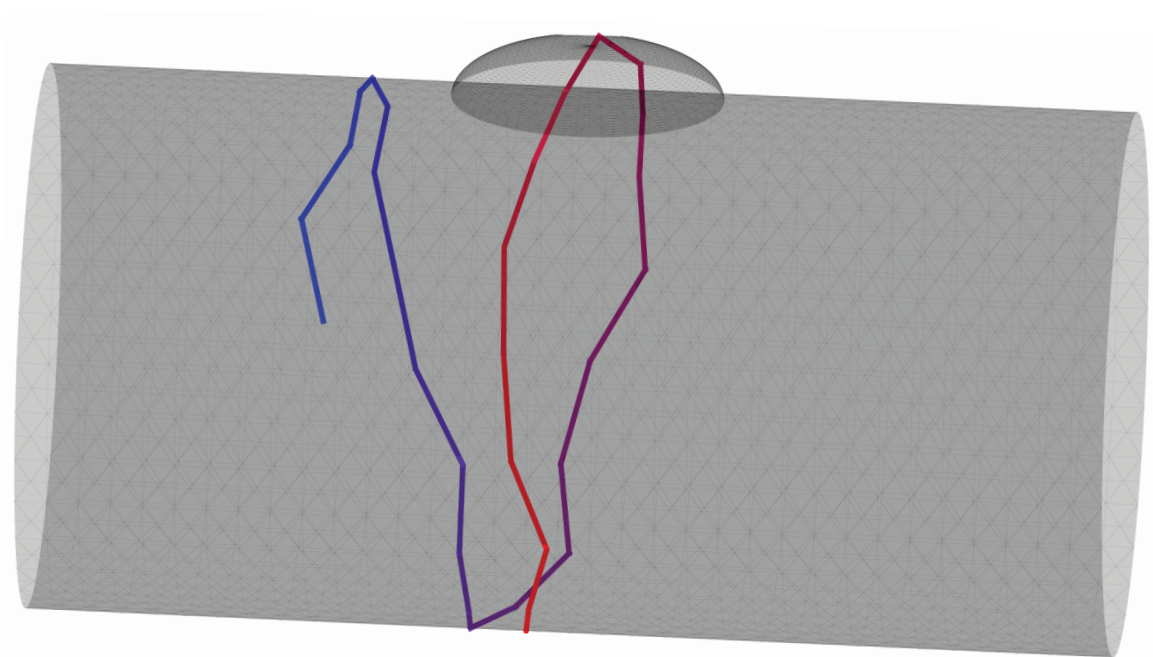

Random translocation

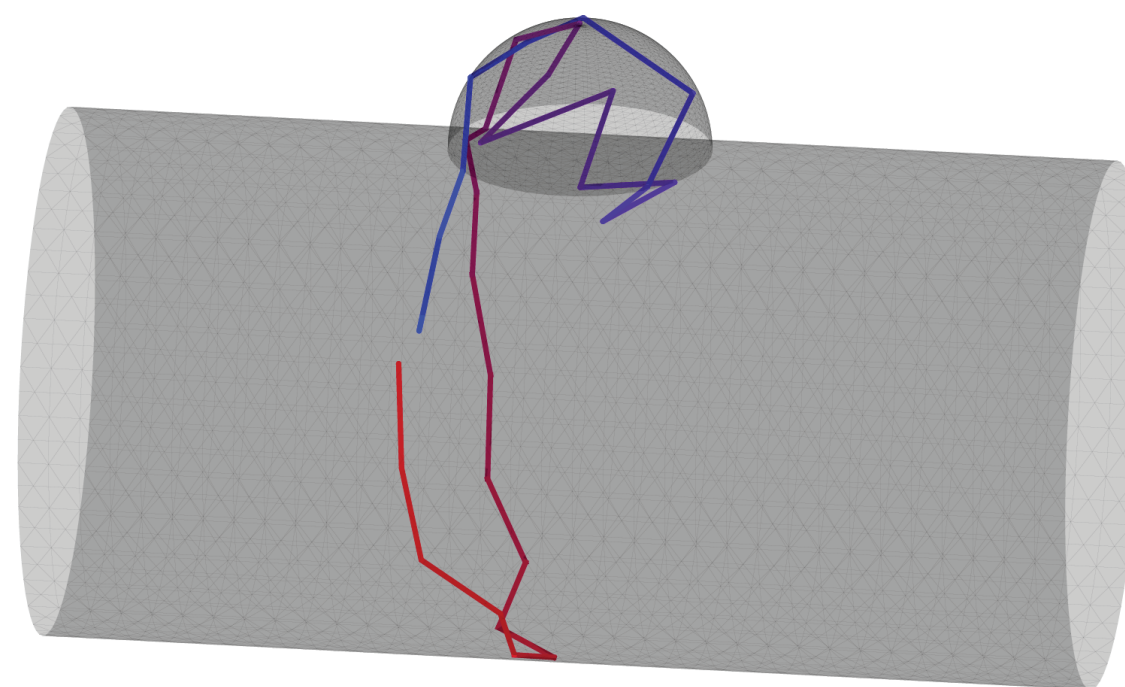

Circumferential translocation

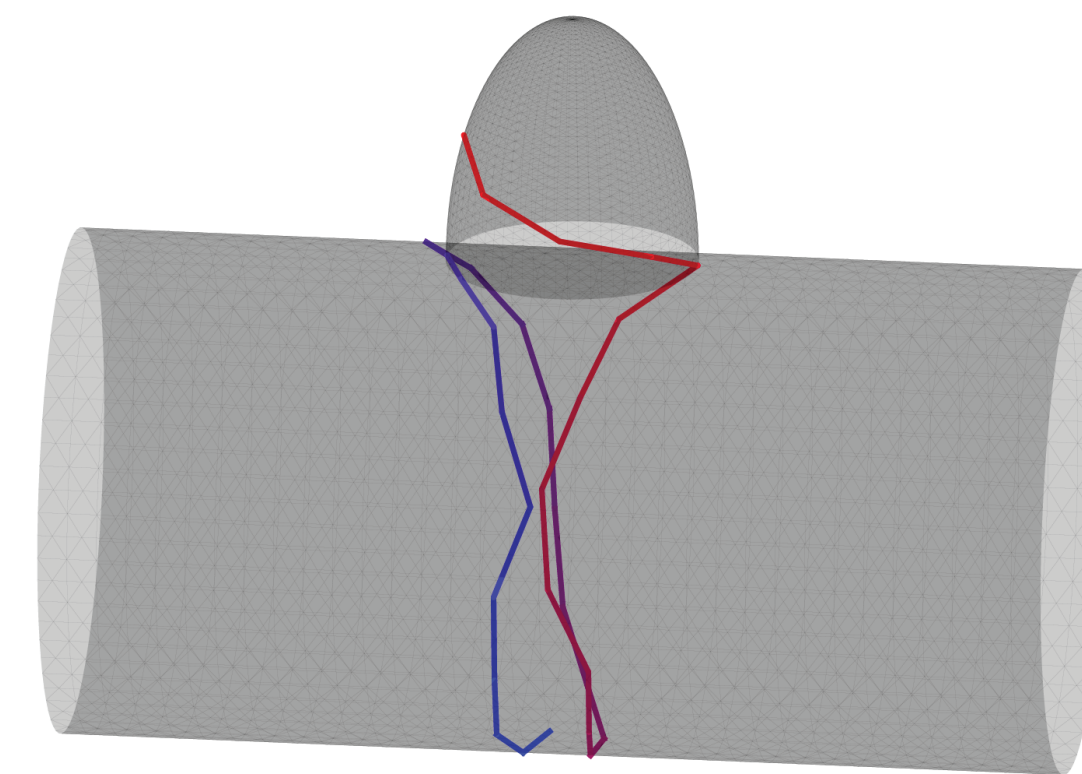

No noise

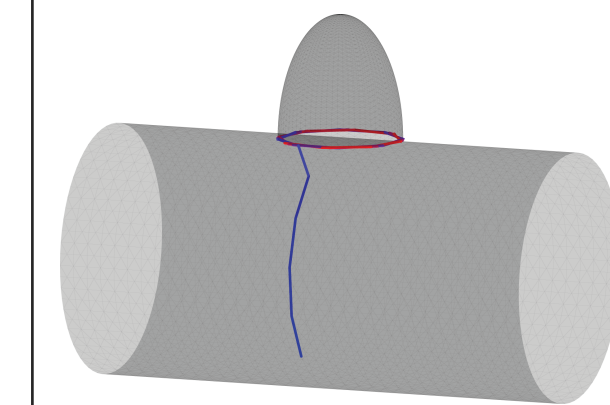**b**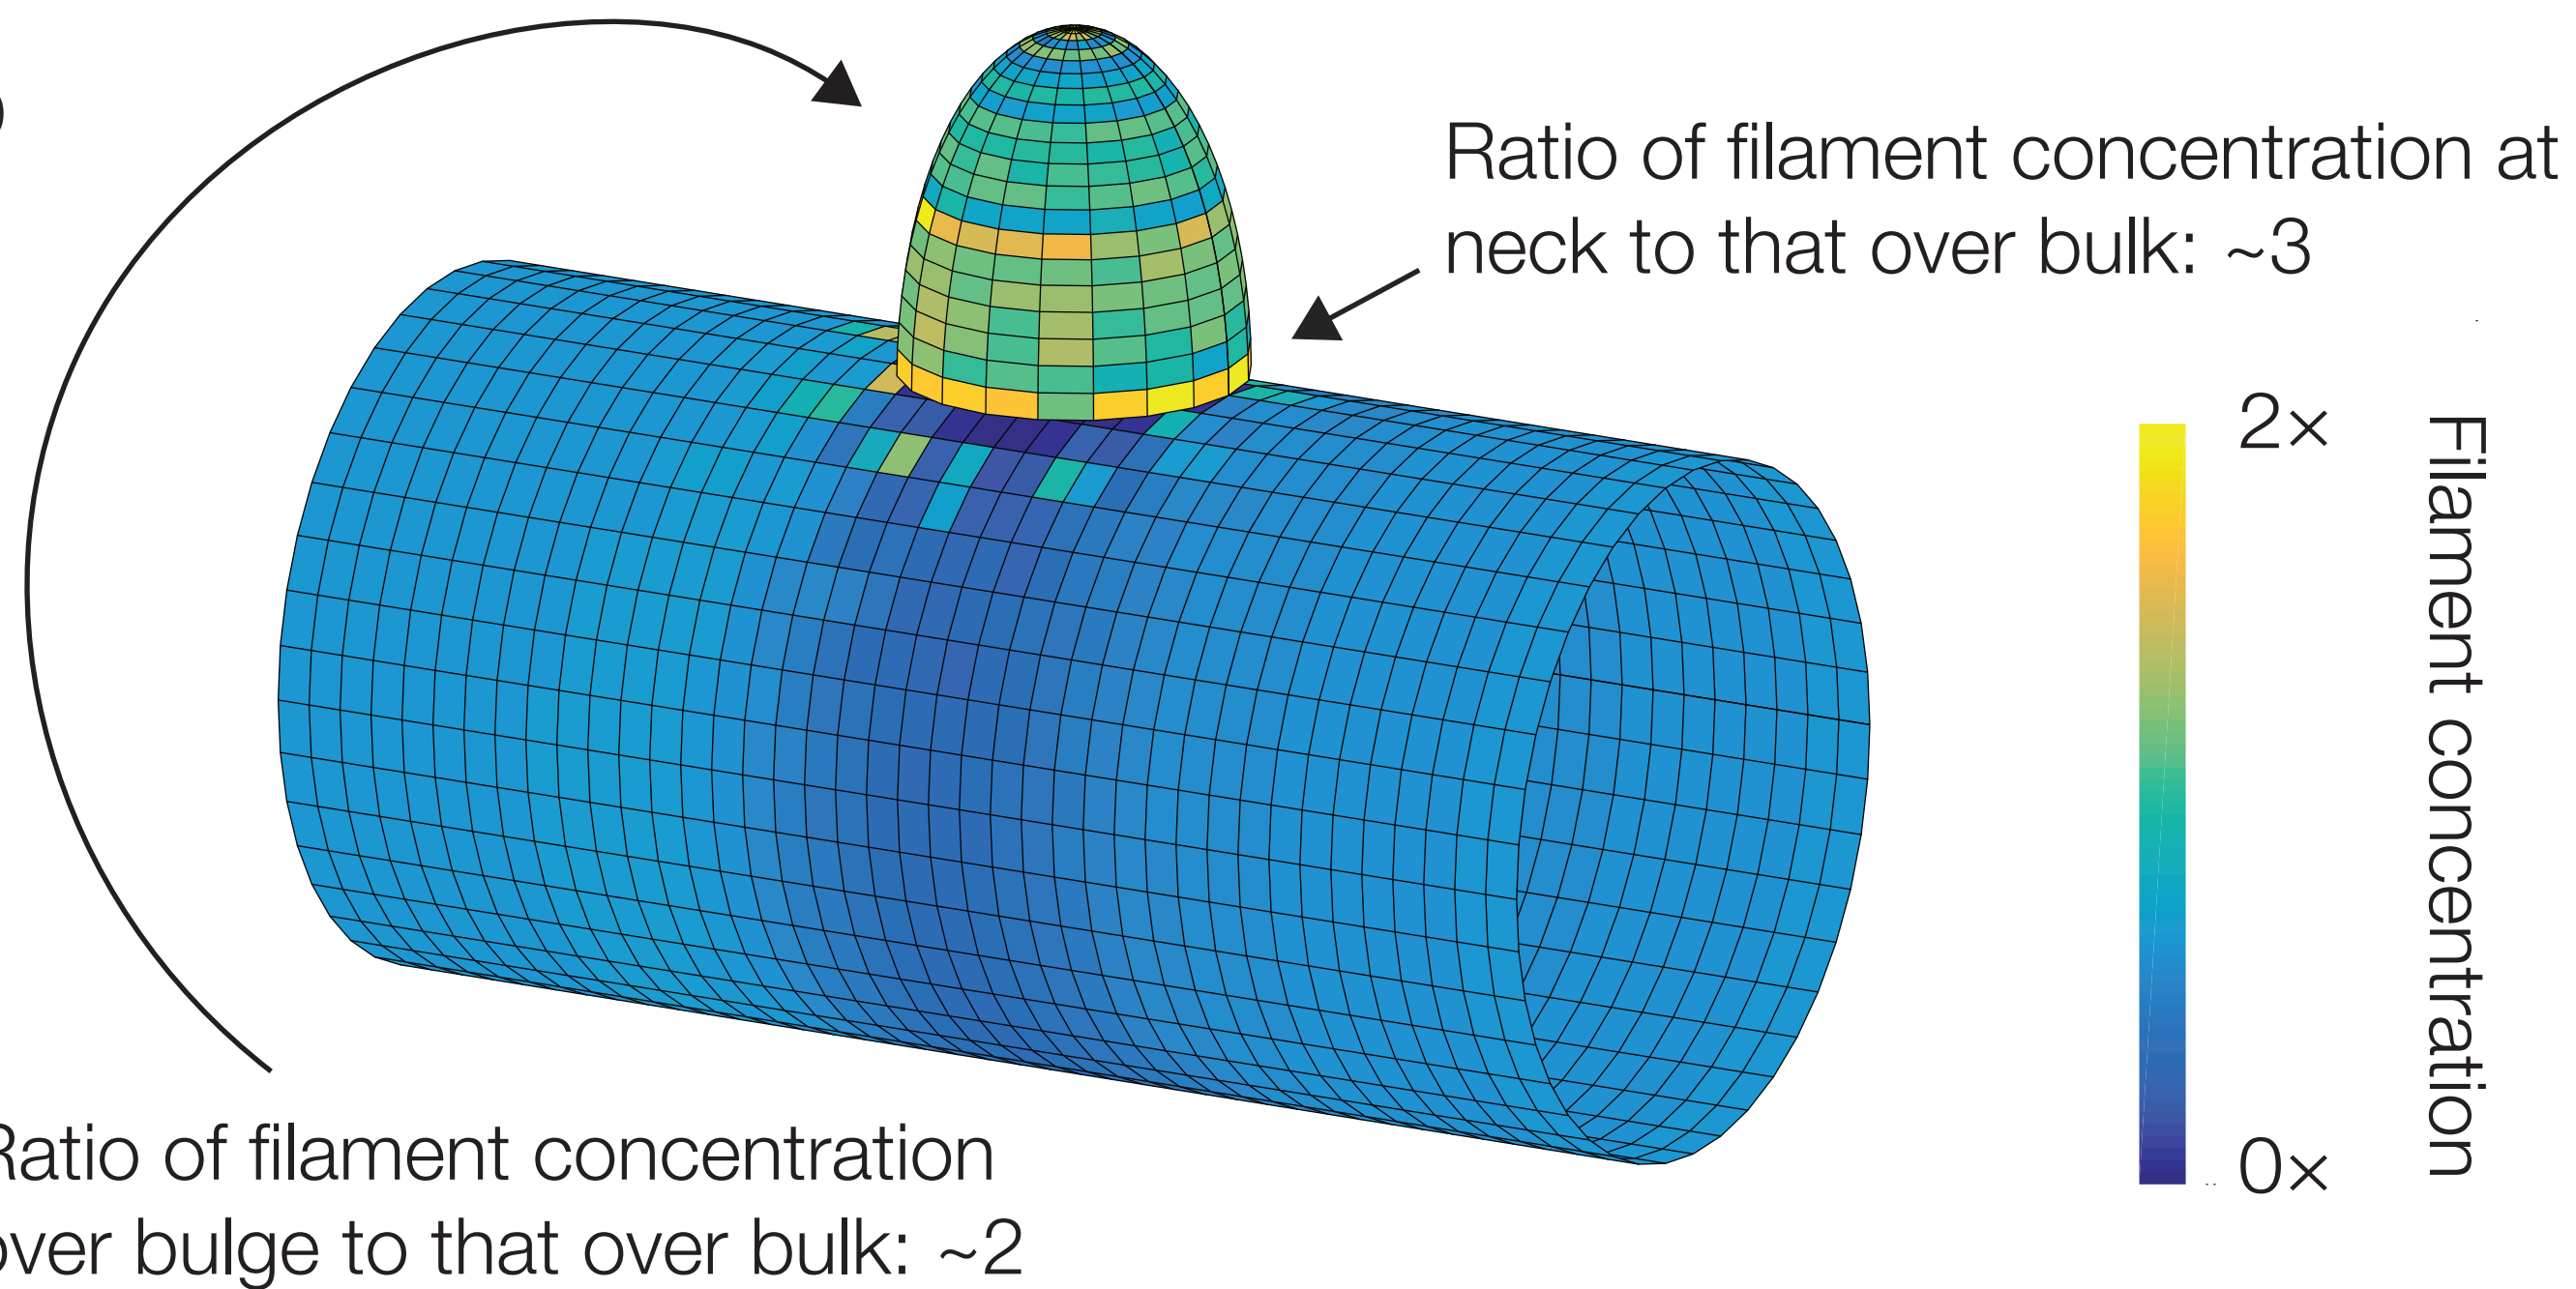Observed neck enrichment:  $\sim 3$ 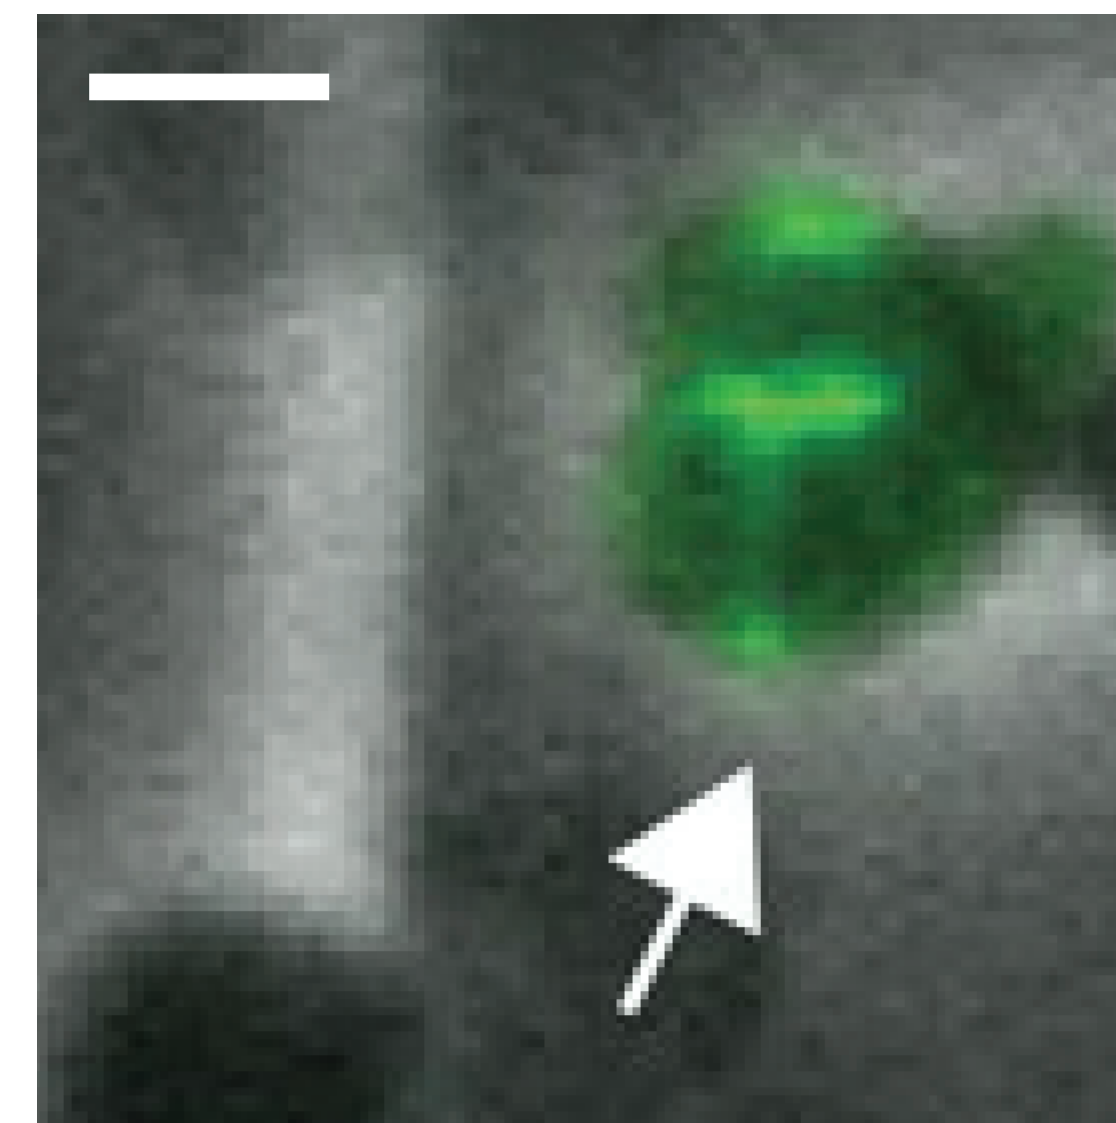

Cell contour

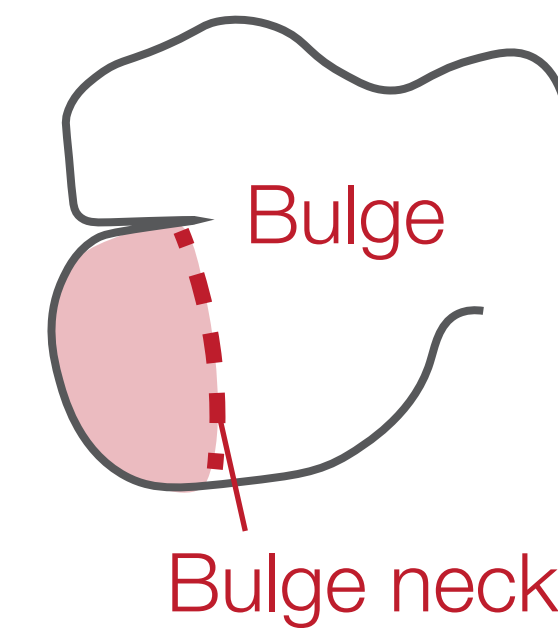

Supplement: supp [file elife-40472-supp-v1.zip]
