# Supplementary material for: Mechanics and dynamics of translocating MreB filaments on curved membranes
Source: eLife journal article supplement (doi:10.7554/elife.40472), 2019-02-18

**a**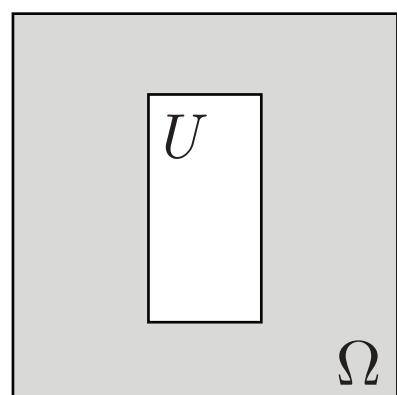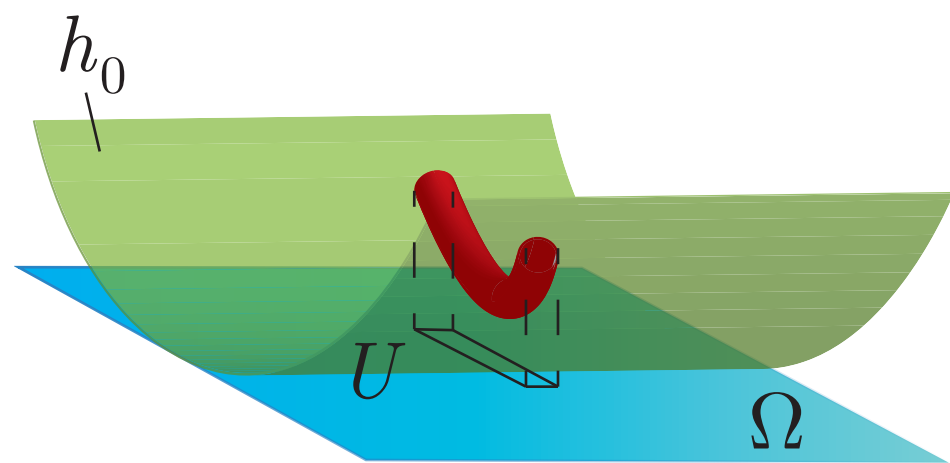

Undeformed

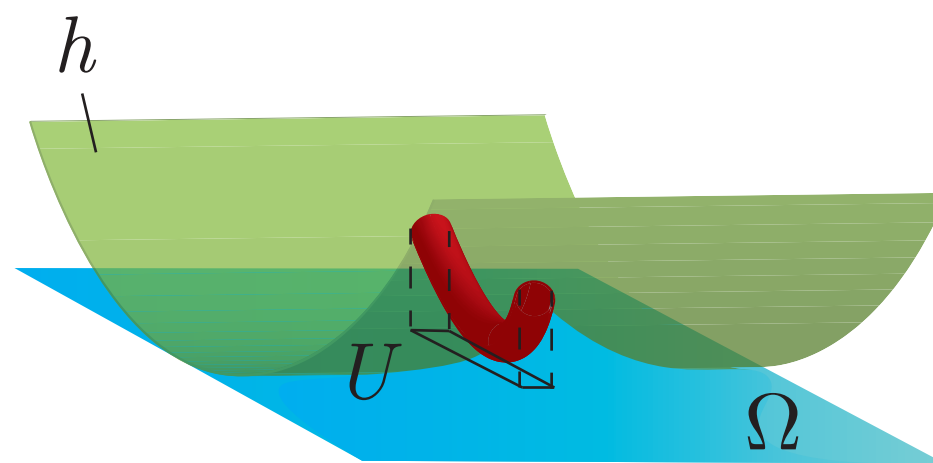

Deformed

$$\Delta E = E_{\text{def}} - E_{\text{int}}$$

**b**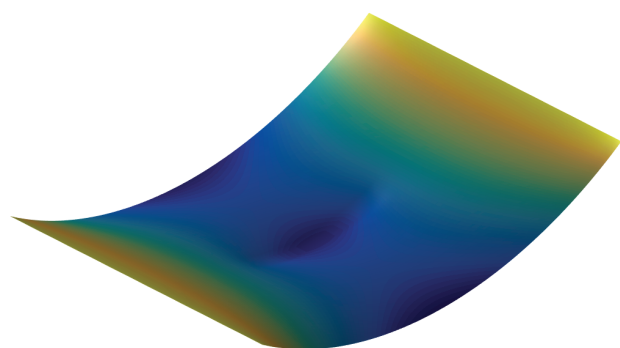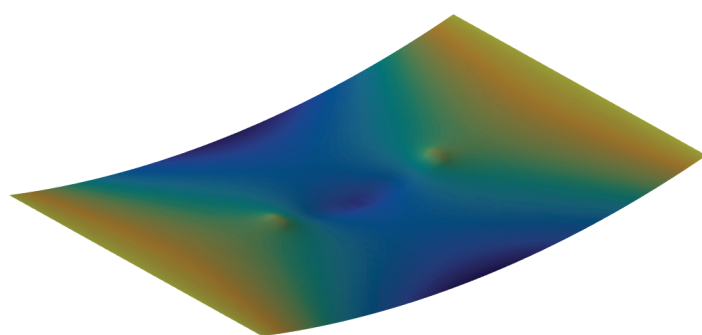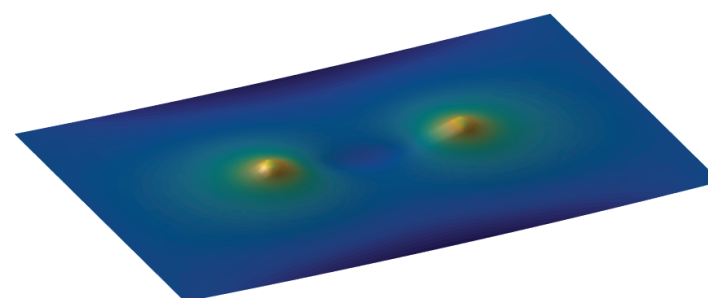

High

Low

Membrane height

**c**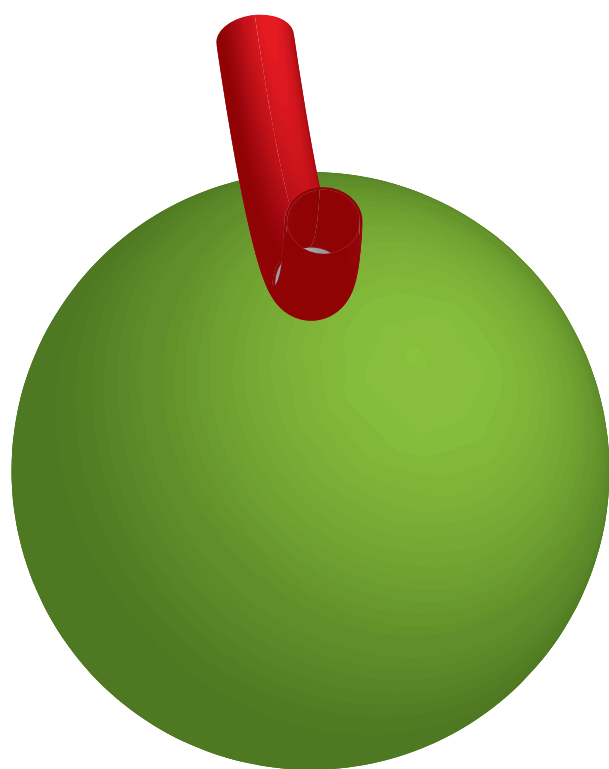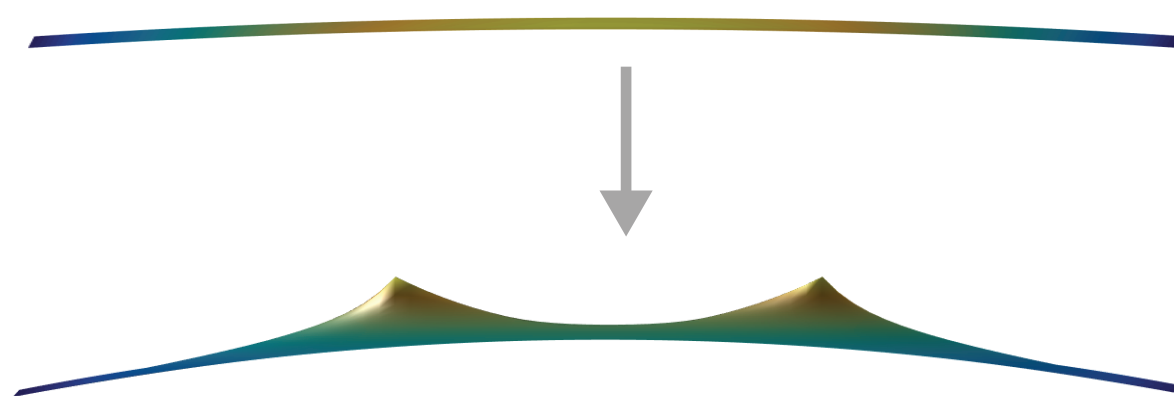

20

0

-20

Membrane height  
(nm)

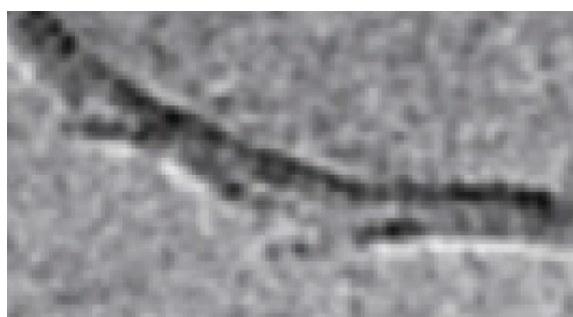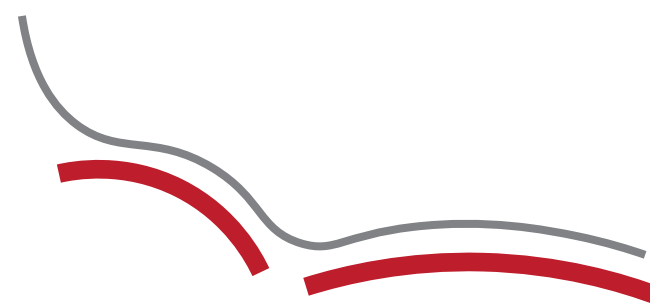

Supplement: supp [file elife-40472-supp-v1.zip]
