# Supplementary material for: Mechanics and dynamics of translocating MreB filaments on curved membranes
Source: eLife journal article supplement (doi:10.7554/elife.40472), 2019-02-18
Supplement: supp [file elife-40472-supp-v1.zip]

| Quantity                                                 | Dimensional Estimate                             | Simulation Value | Source         |
|----------------------------------------------------------|--------------------------------------------------|------------------|----------------|
| MreB translocation step size, $L$                        | 200 nm                                           | 0.4              | this work      |
|                                                          | 30 nm-1 $\mu\text{m}$                            | –                | this work      |
| Time per step                                            | $L/v = 20$ s (7 s)                               | –                | –              |
| Cell radius, $a$                                         | 0.5 $\mu\text{m}$                                | 1                | –              |
| Typical cell length                                      | 2 $\mu\text{m}$                                  | 4                | –              |
| Number of steps, $N$                                     | $\sim 20$ min                                    | 60 (170)         | –              |
| Filament speed, $v$                                      | 10 nm/s (30 nm/s)                                | –                | [1, 30, 31]    |
|                                                          | 5-30 nm/s (20-85 nm/s)                           | –                | [1, 19, 30–34] |
| Time per step                                            | $L/v = 20$ s (7 s)                               | –                | –              |
| Activation rate, $k$                                     | $\sim 20 \mu\text{m}^{-2} \cdot \text{min}^{-1}$ | 40 (15)          | [13]           |
| MreB filament persistence time, $\tau$                   | 5 min                                            | –                | [14]           |
| Deactivation rate, $\lambda$                             | $1/\tau = 0.2 \text{ min}^{-1}$                  | 0.07 (0.02)      | –              |
| Linear dependence of $\sigma$ on $\Delta c$ , $\alpha$   | (0.6 rad $\cdot \mu\text{m}^{-1}$ )              | 0.3              | –              |
| Quadratic dependence of $\sigma$ on $\Delta c$ , $\beta$ | (0.6 rad $\cdot \mu\text{m}^{-2}$ )              | 0.15             | –              |
| Typical translocation noise, $\sigma$                    | 0.3 rad                                          | 0.3              | [1]            |
|                                                          | 0.1-0.5 rad                                      | –                | [1, 21, 31]    |

Supplementary file 3: Variables used, or calculated, in the model of filament translocation and their numerical values for *E. coli*. Values exclusive to *B. subtilis*, when relevant, are in parentheses, and dashes denote values that are not used or not relevant. The first value listed is the value assumed in this work, and subsequent values, when available, indicate estimated ranges for the same variable.
