# Supplementary figures and images for: Mechanics and dynamics of translocating MreB filaments on curved membranes
Source: eLife journal article supplement (doi:10.7554/elife.40472), 2019-02-18

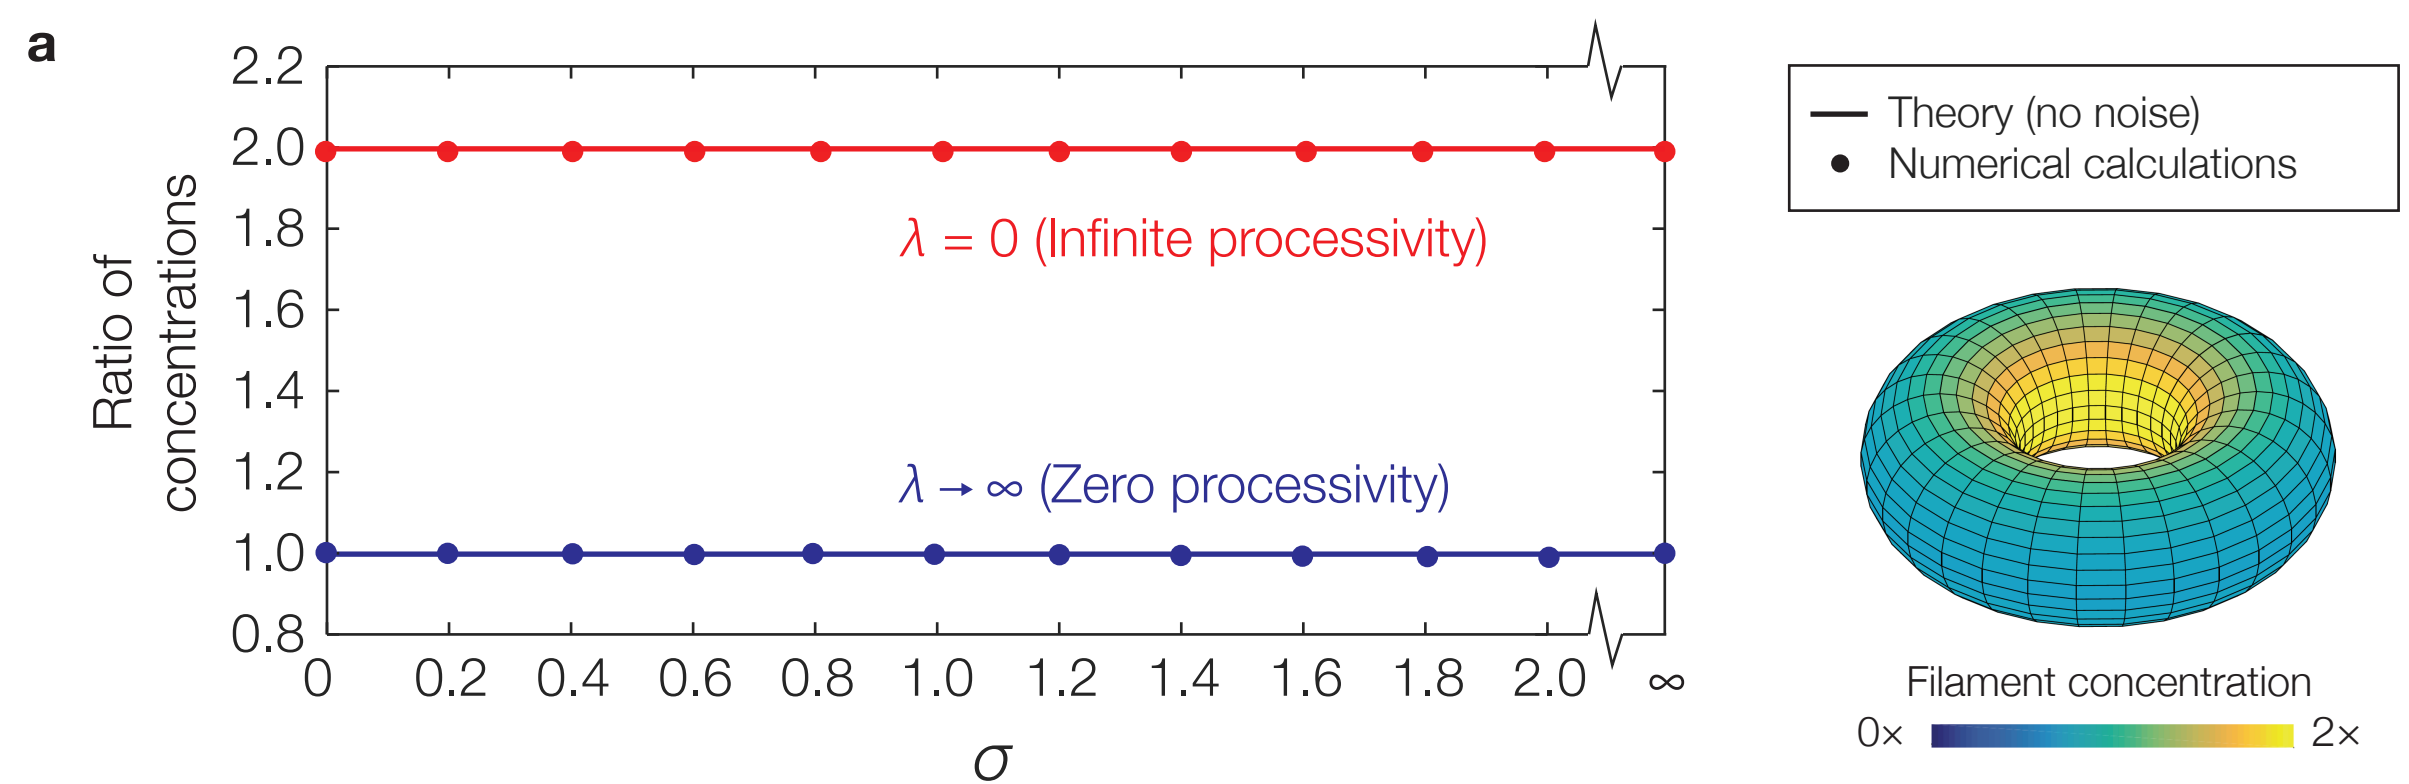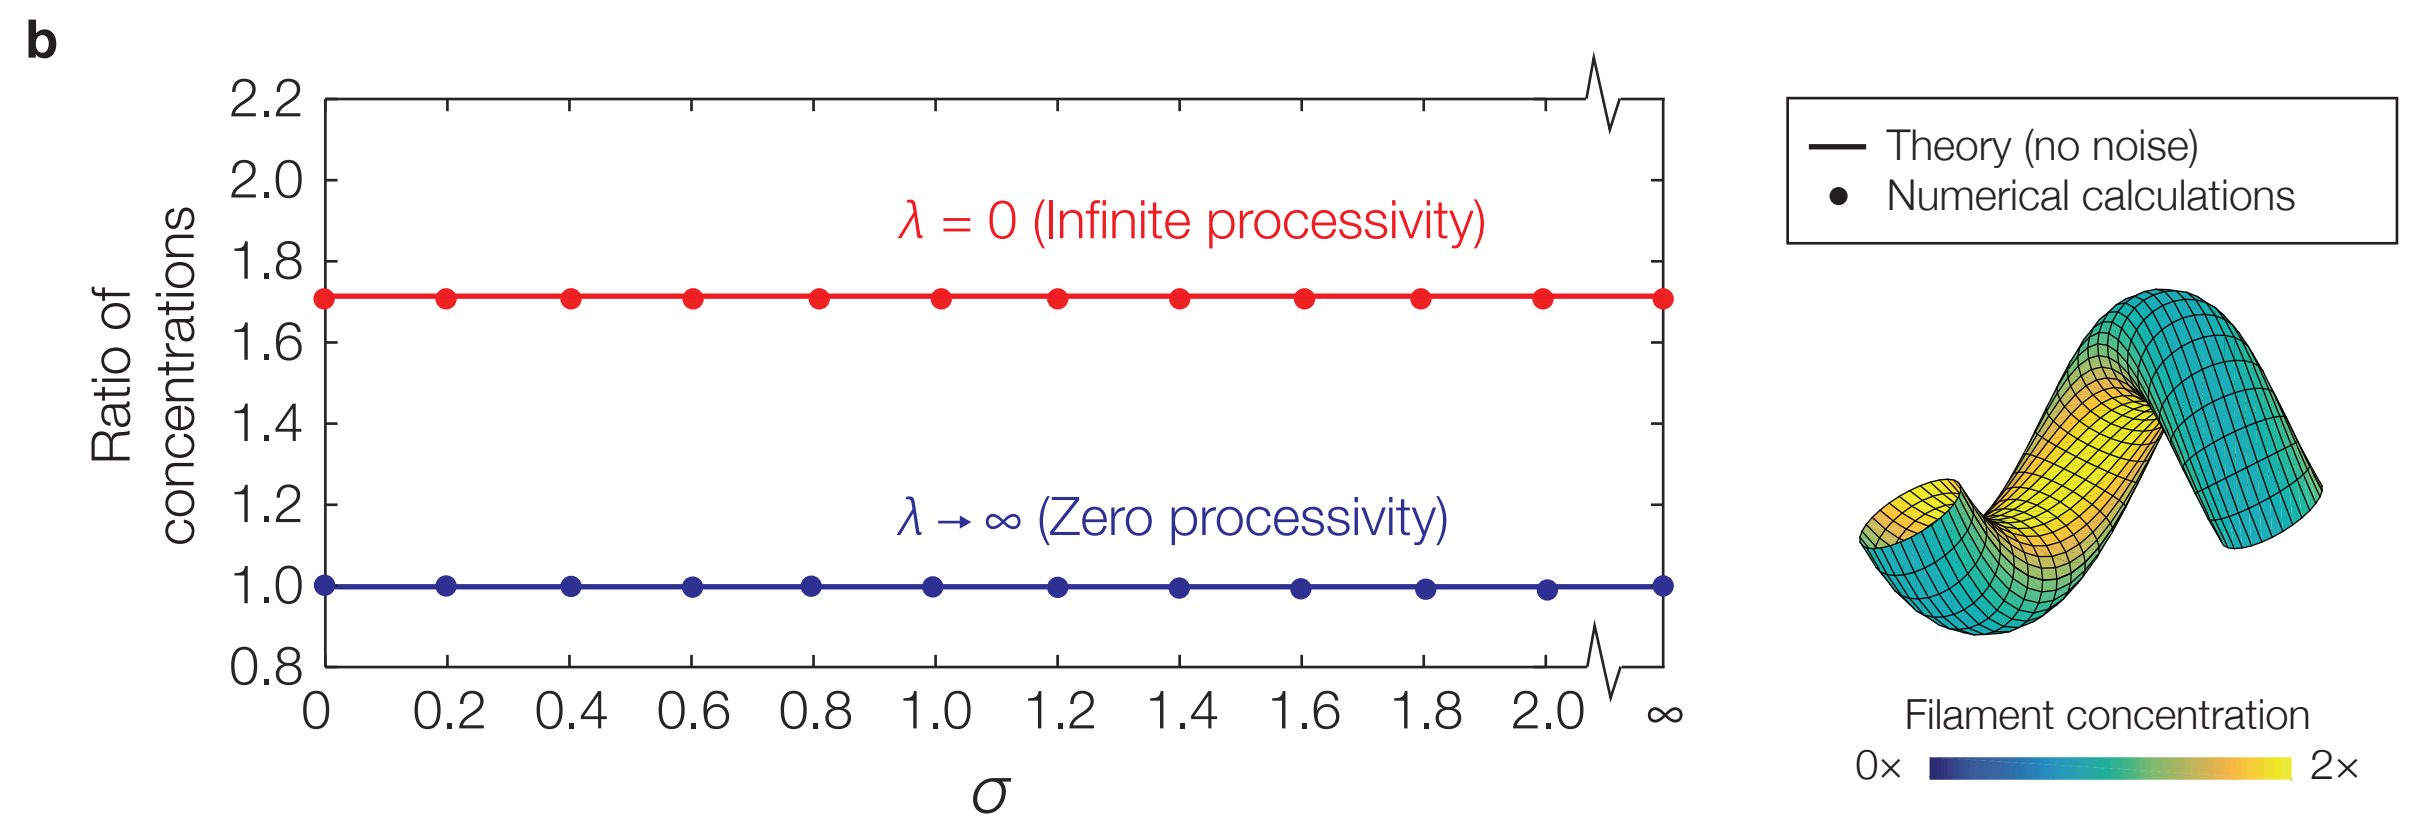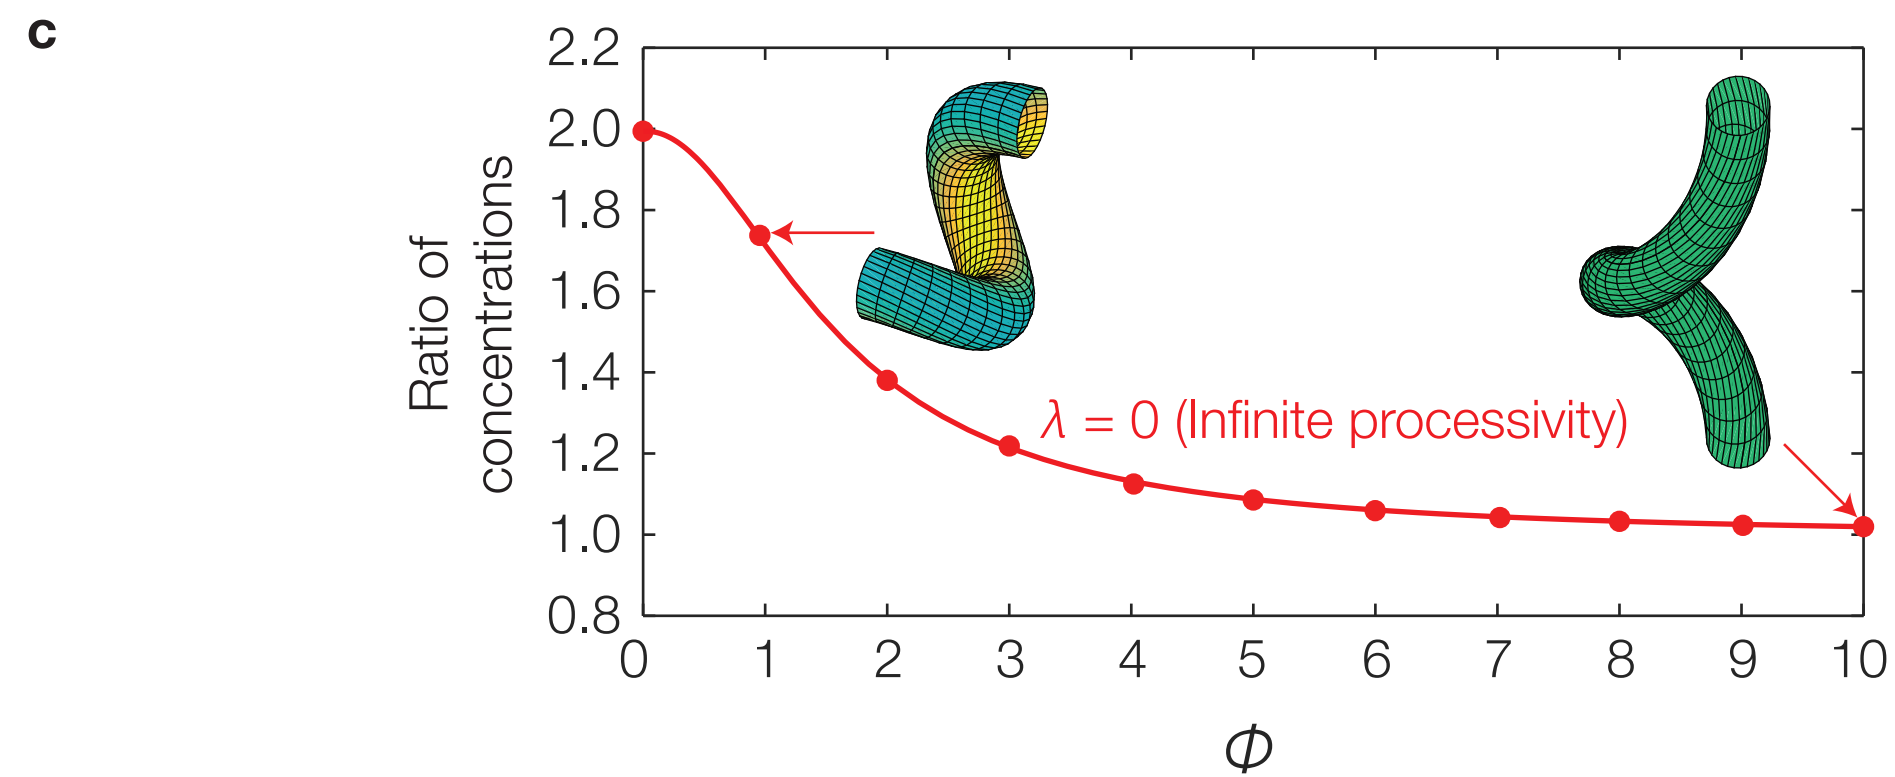

Supplement: supp [file elife-40472-supp-v1.zip]

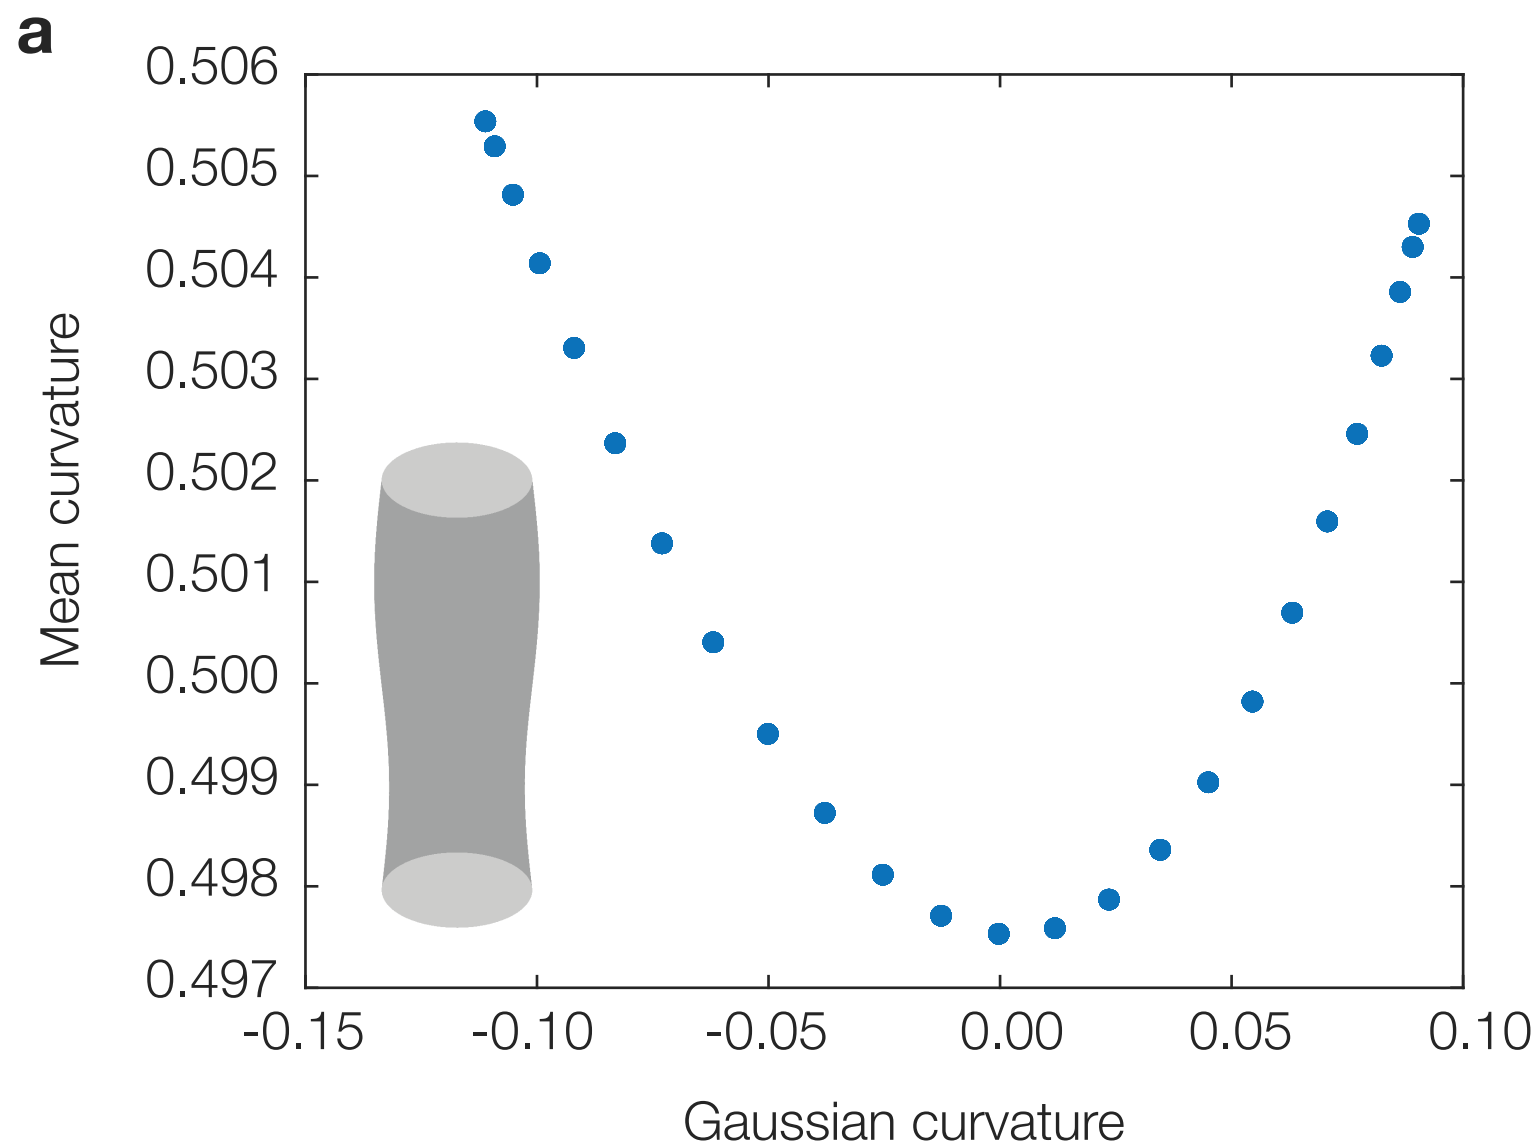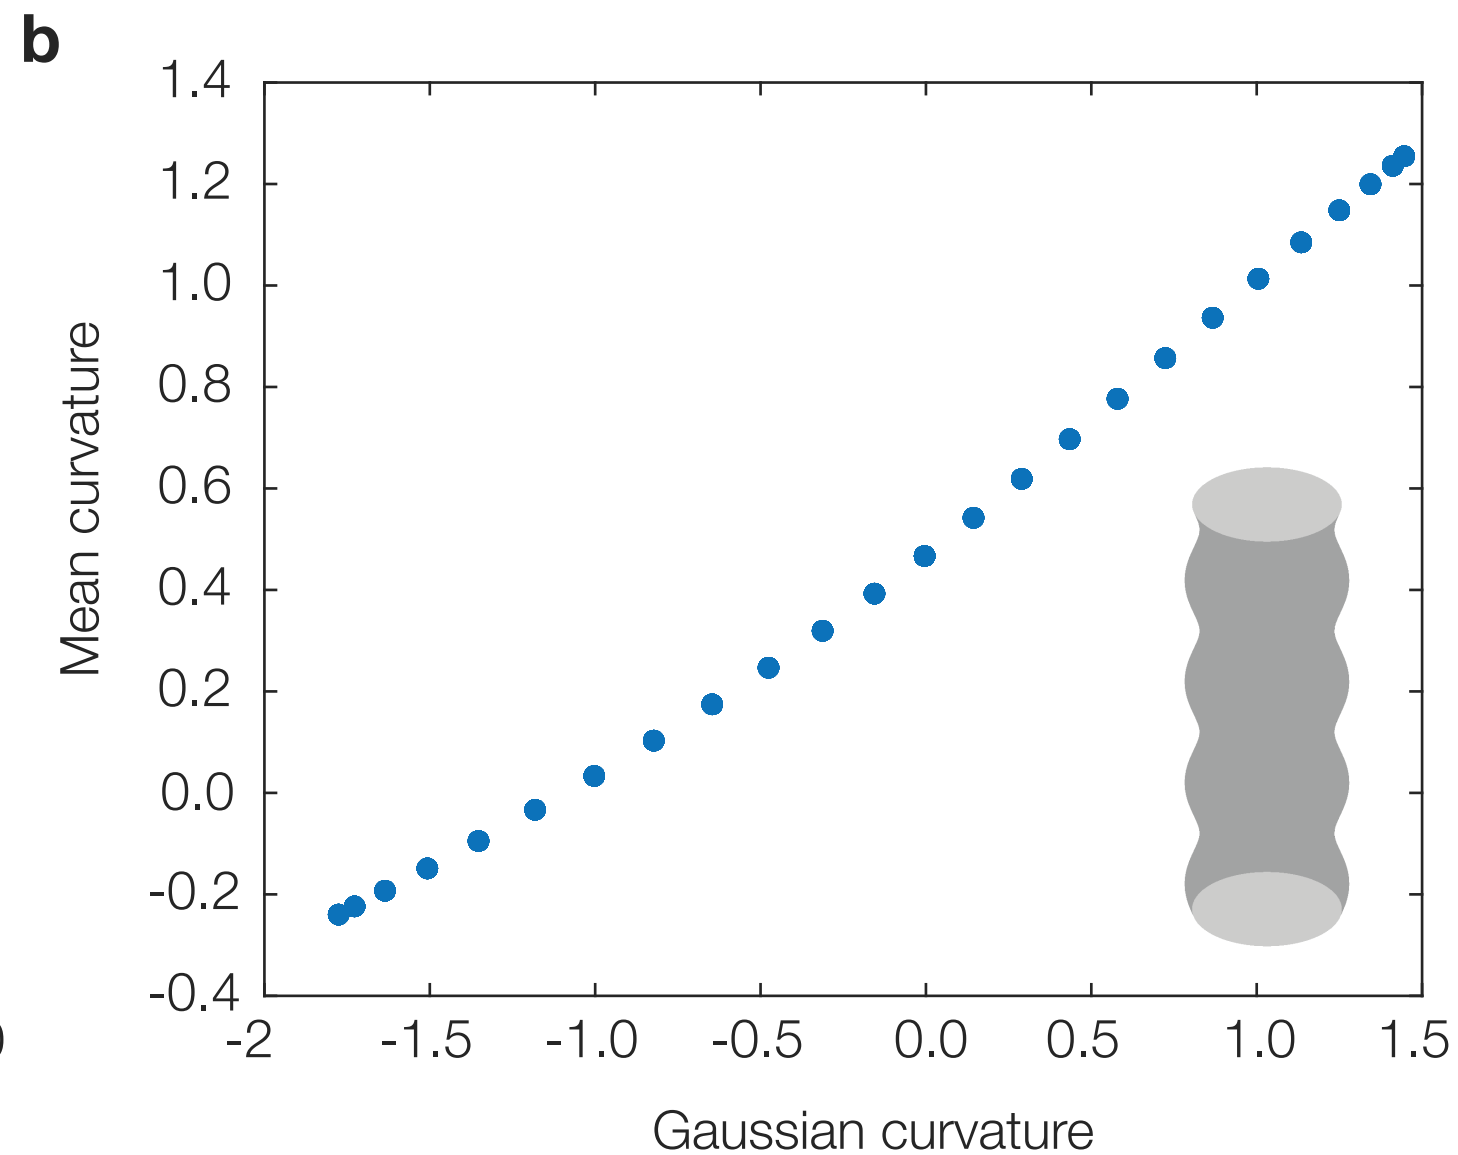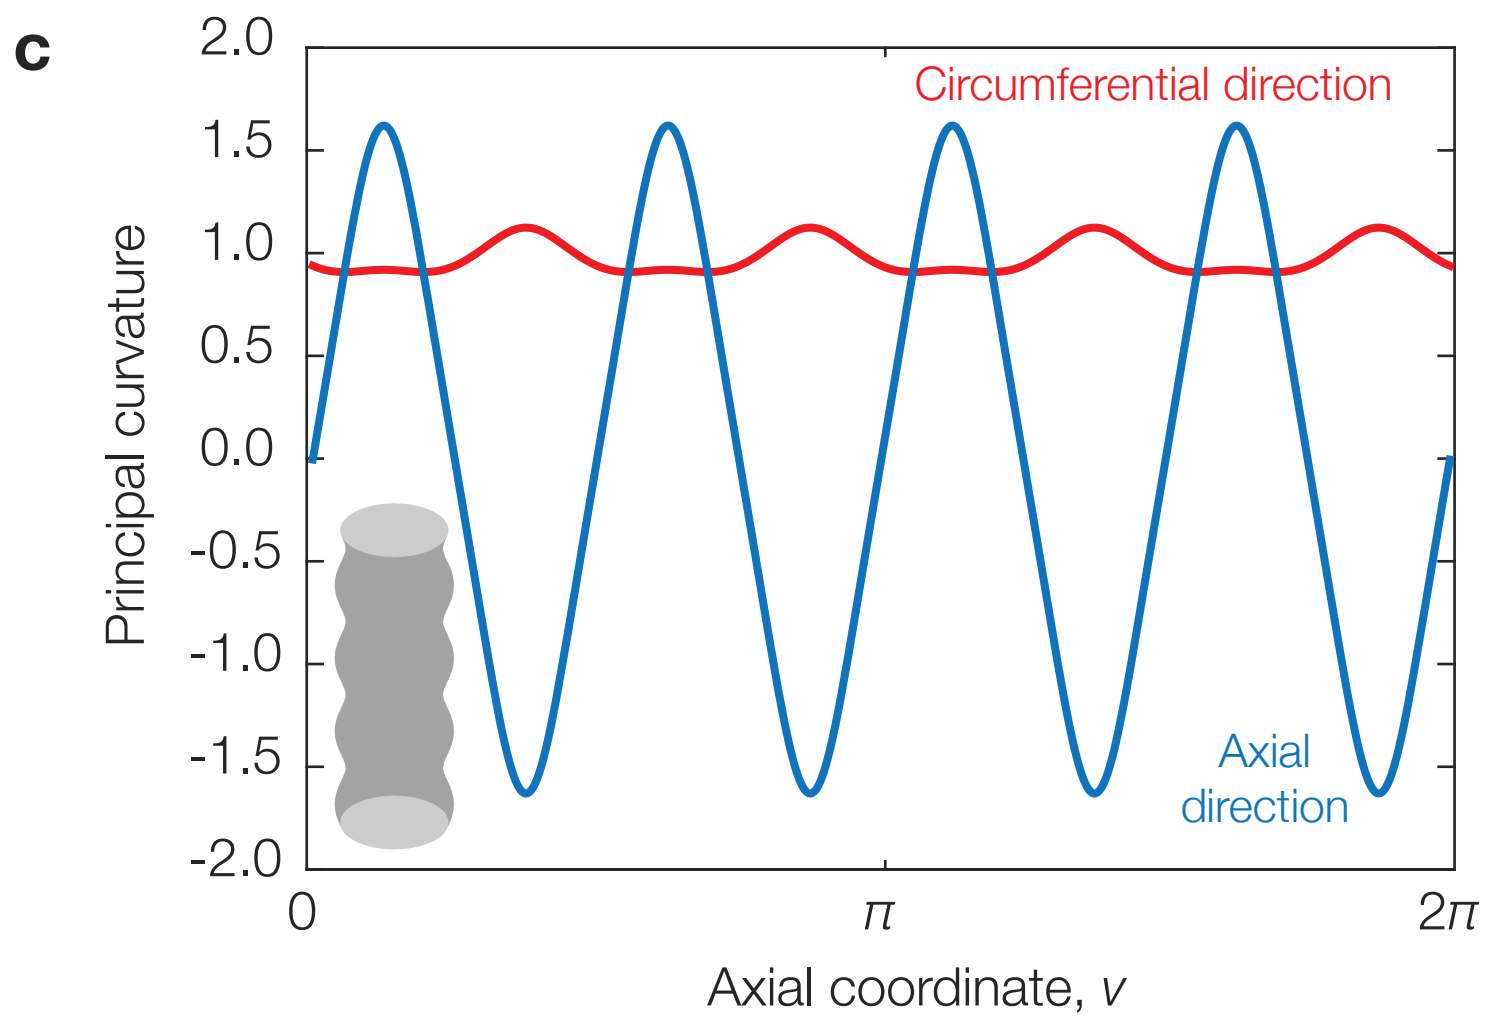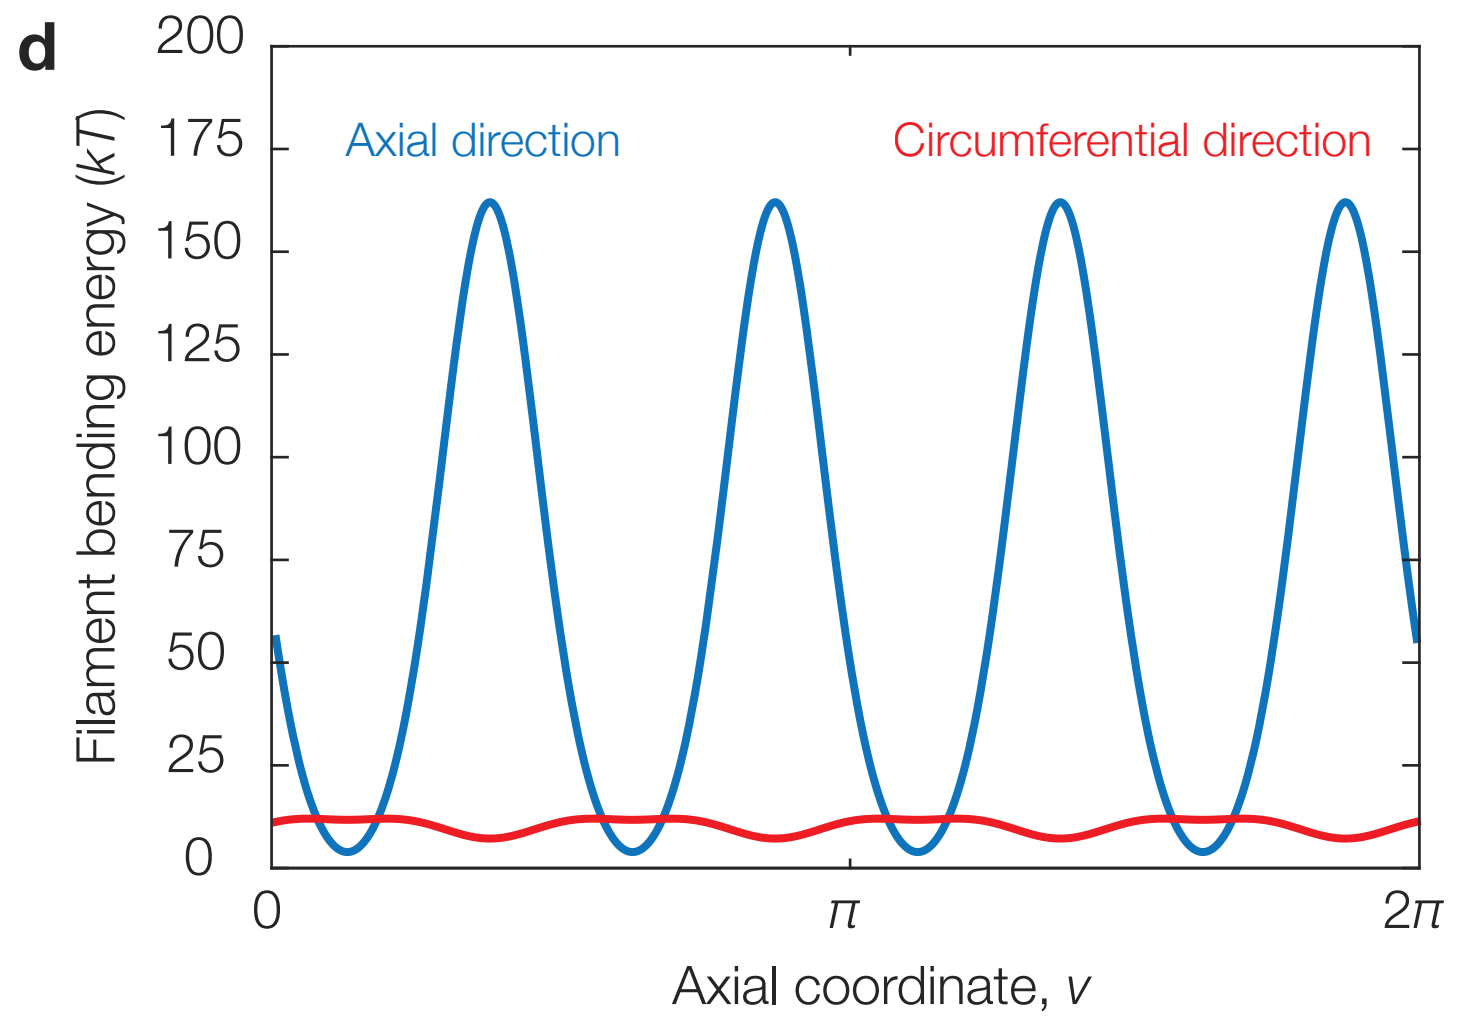

Supplement: supp [file elife-40472-supp-v1.zip]

**a**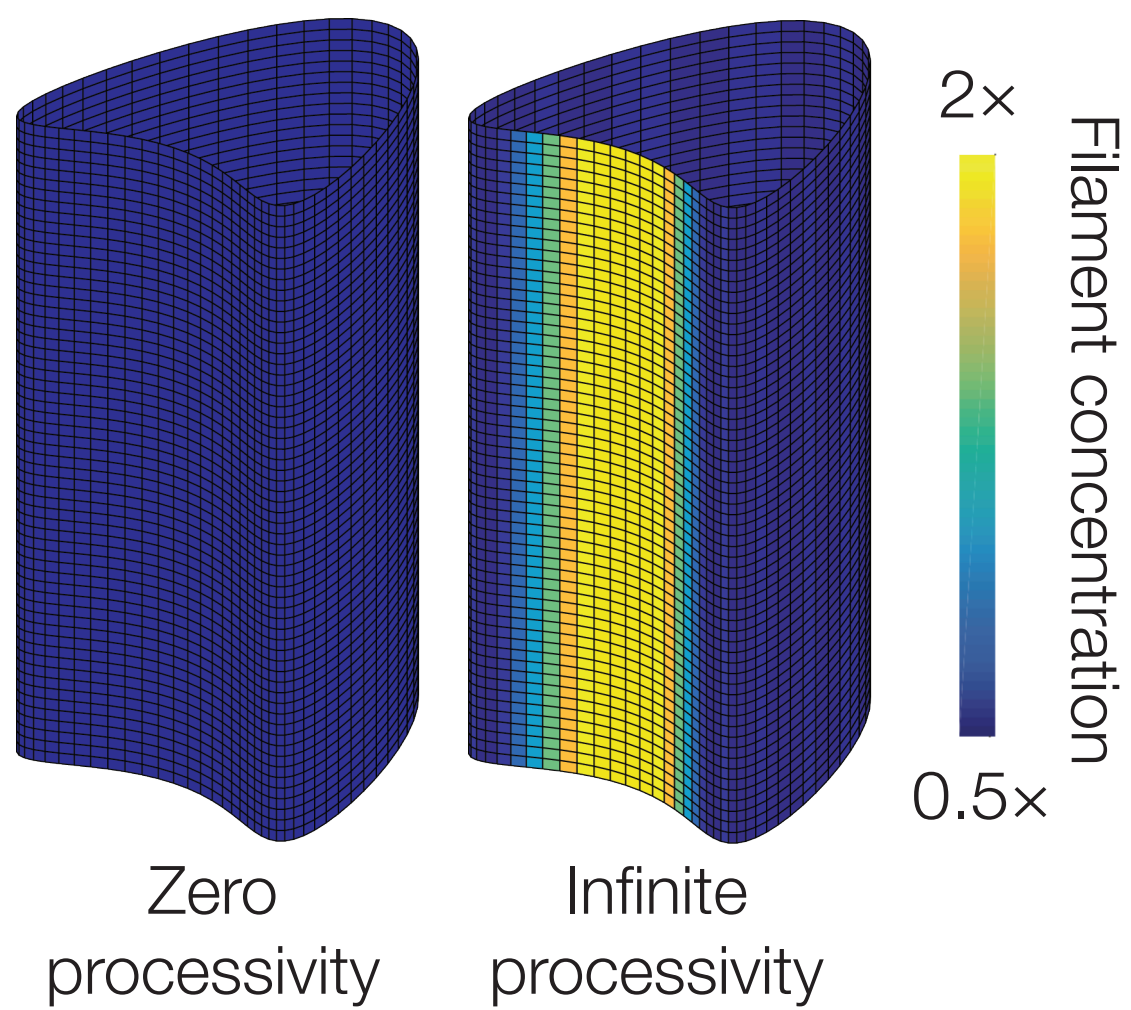**b**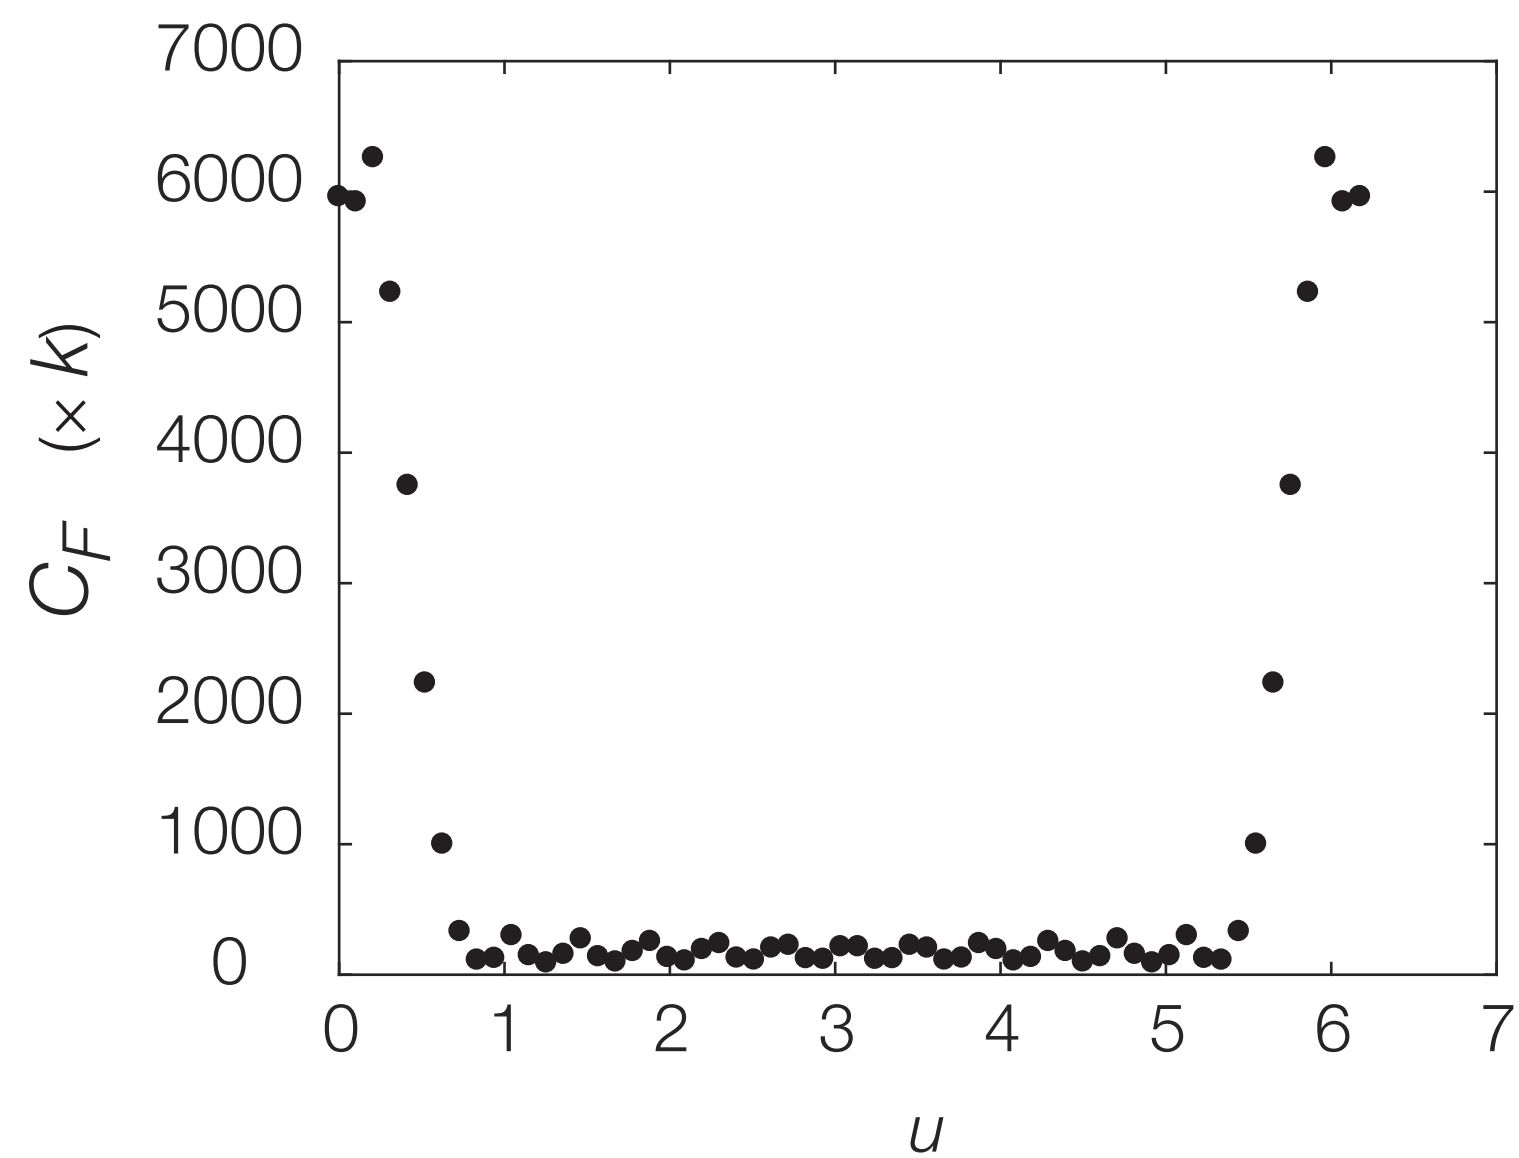**c**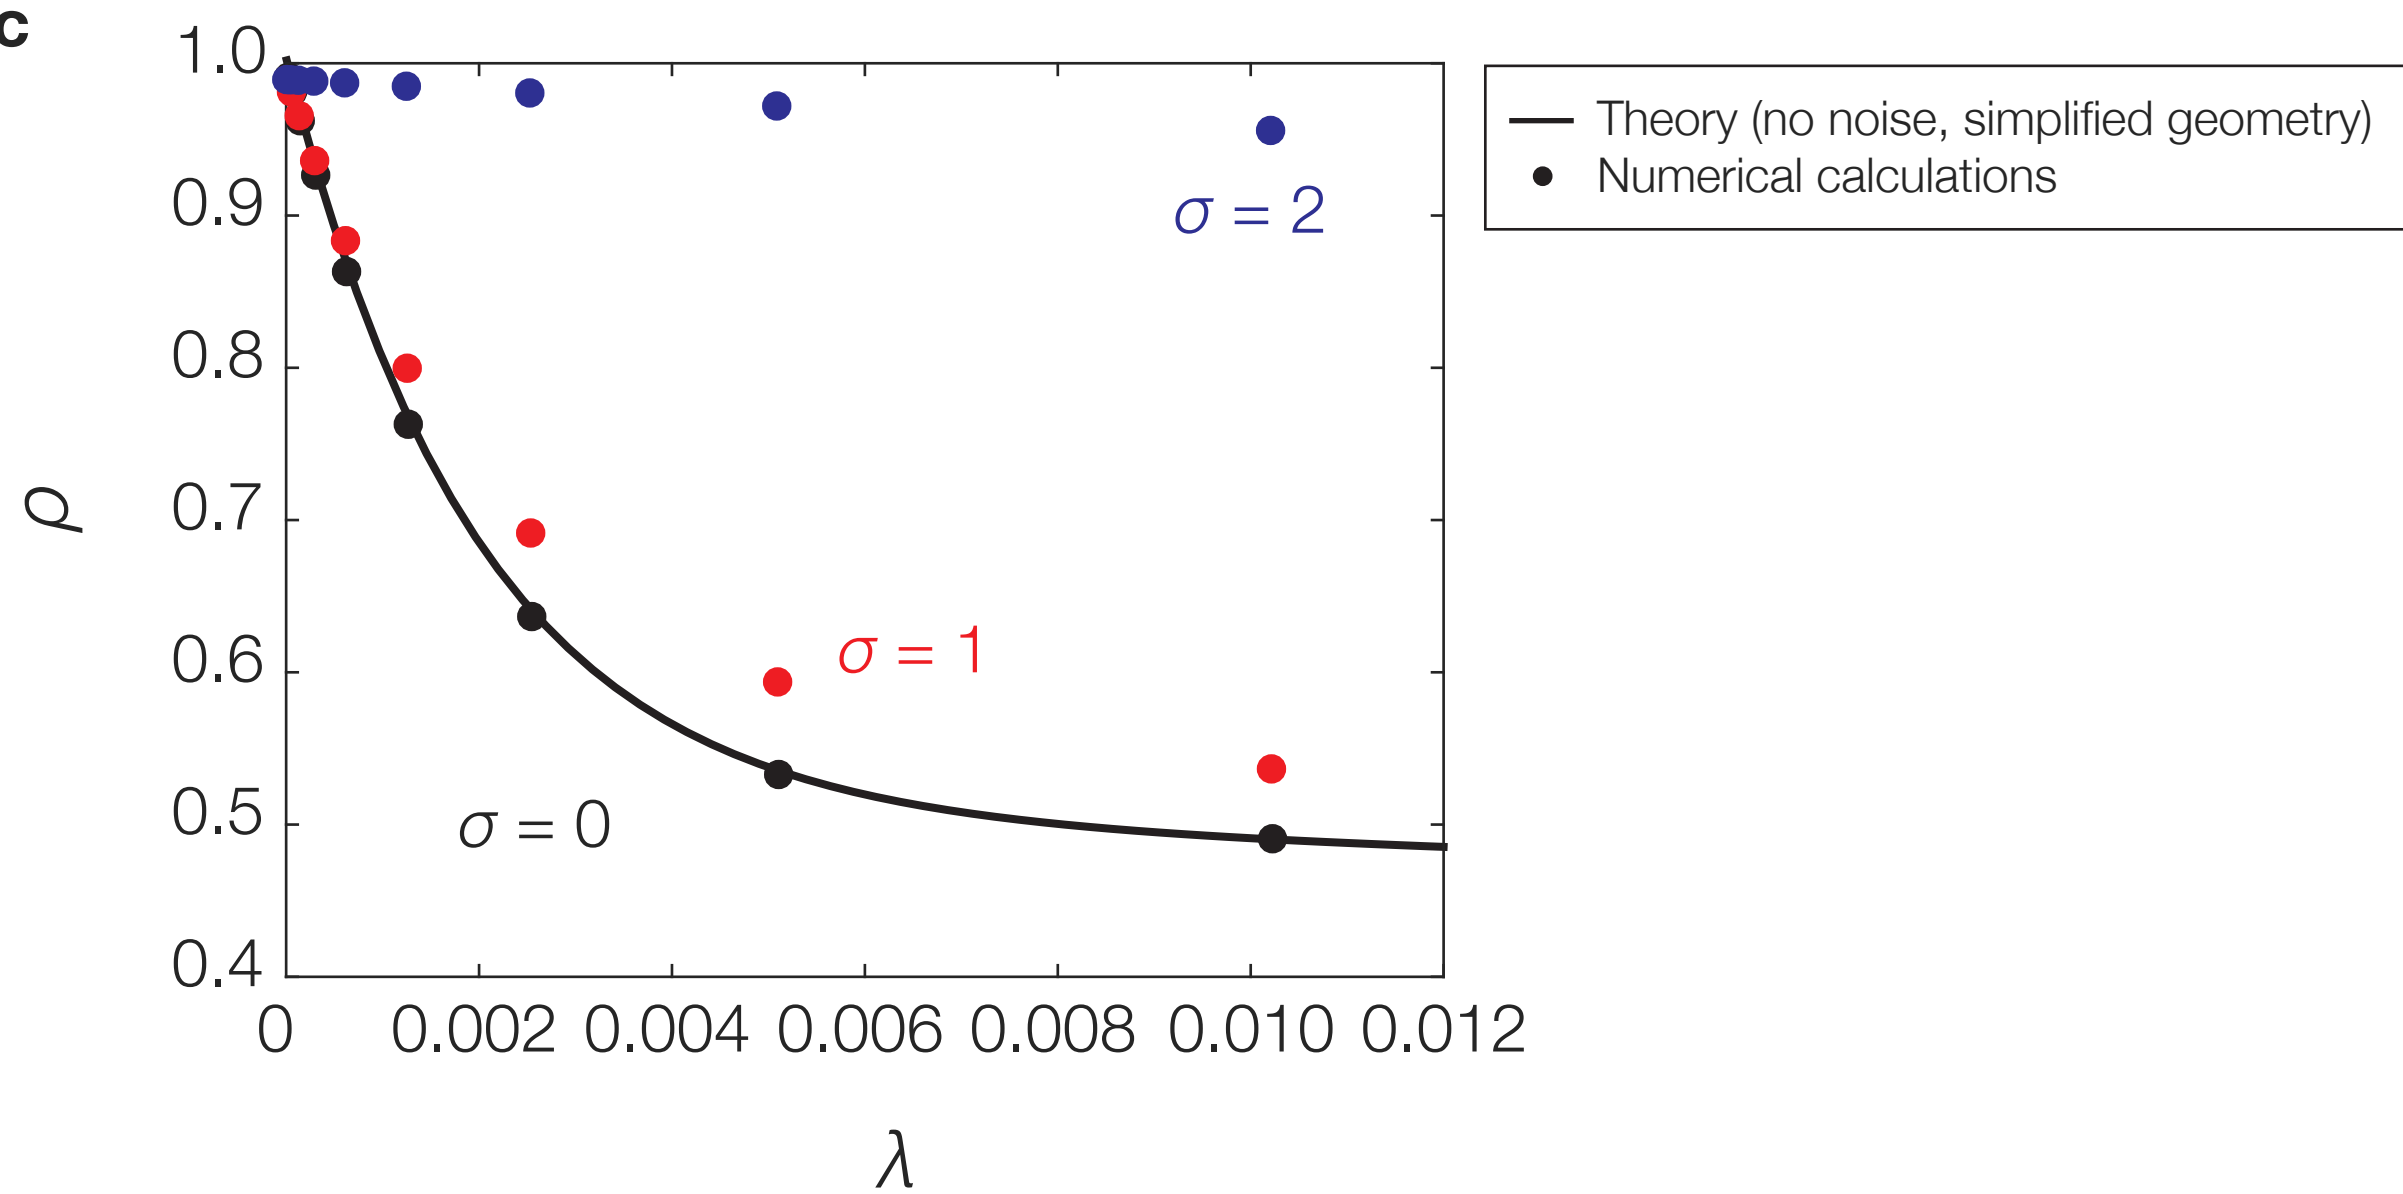

Supplement: supp [file elife-40472-supp-v1.zip]

**a**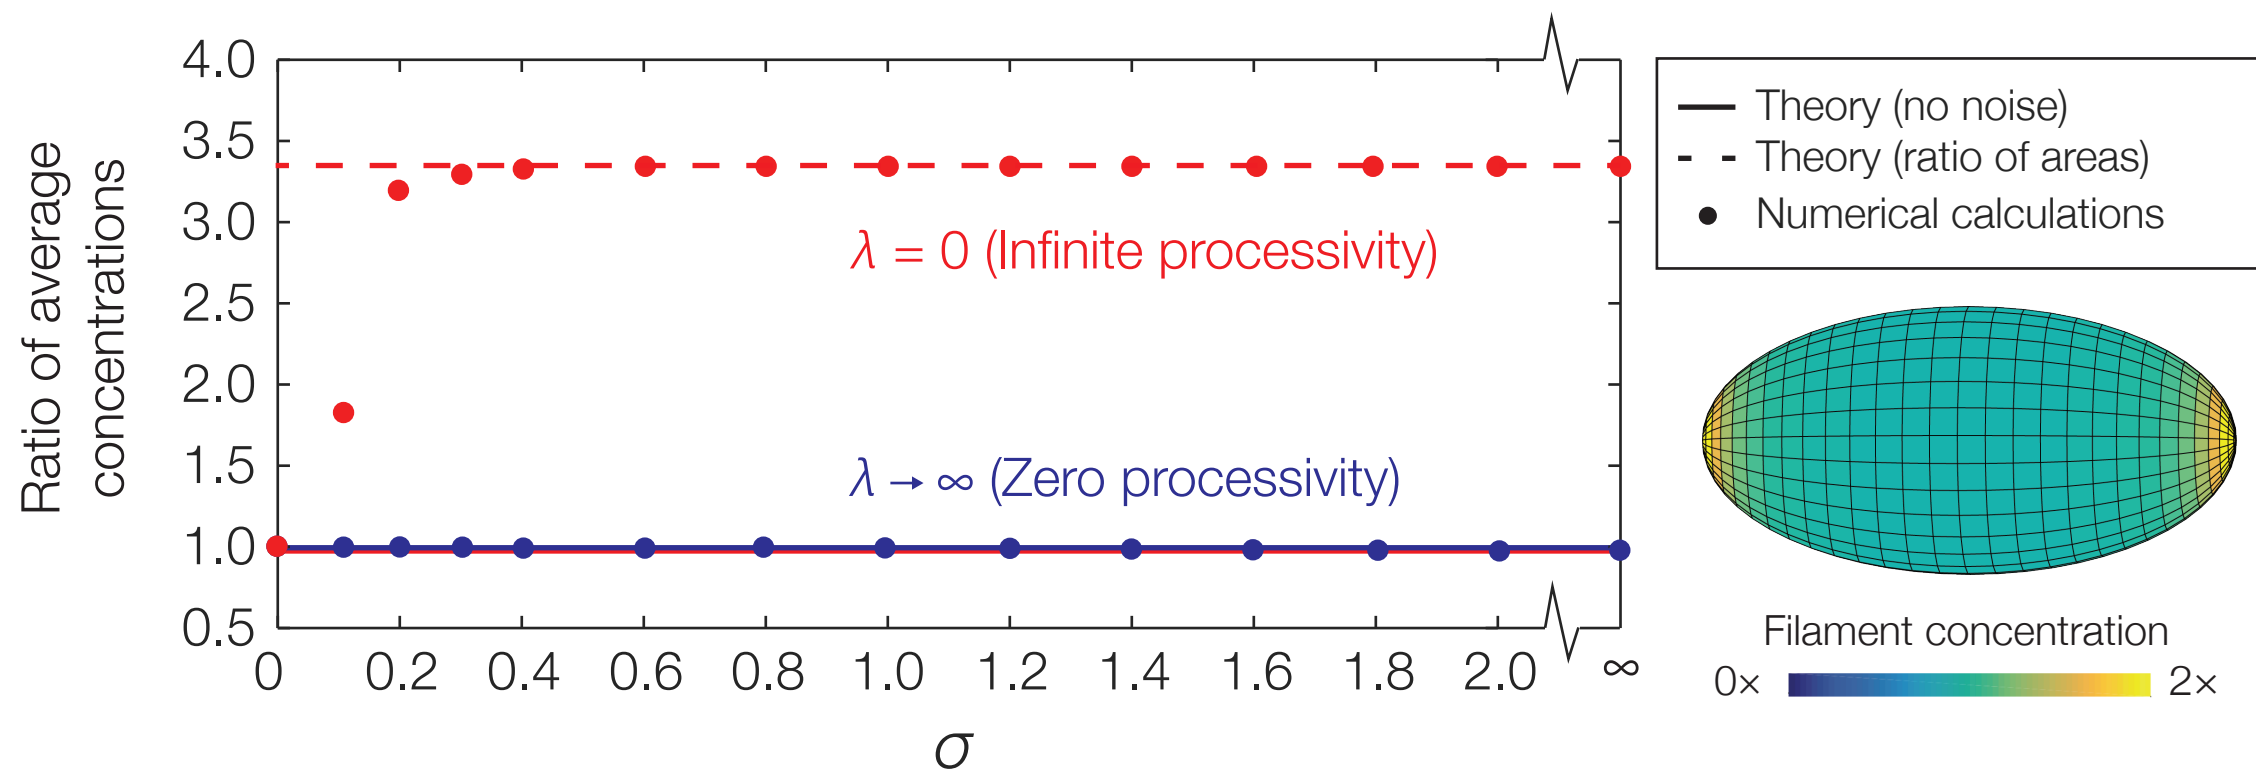**b**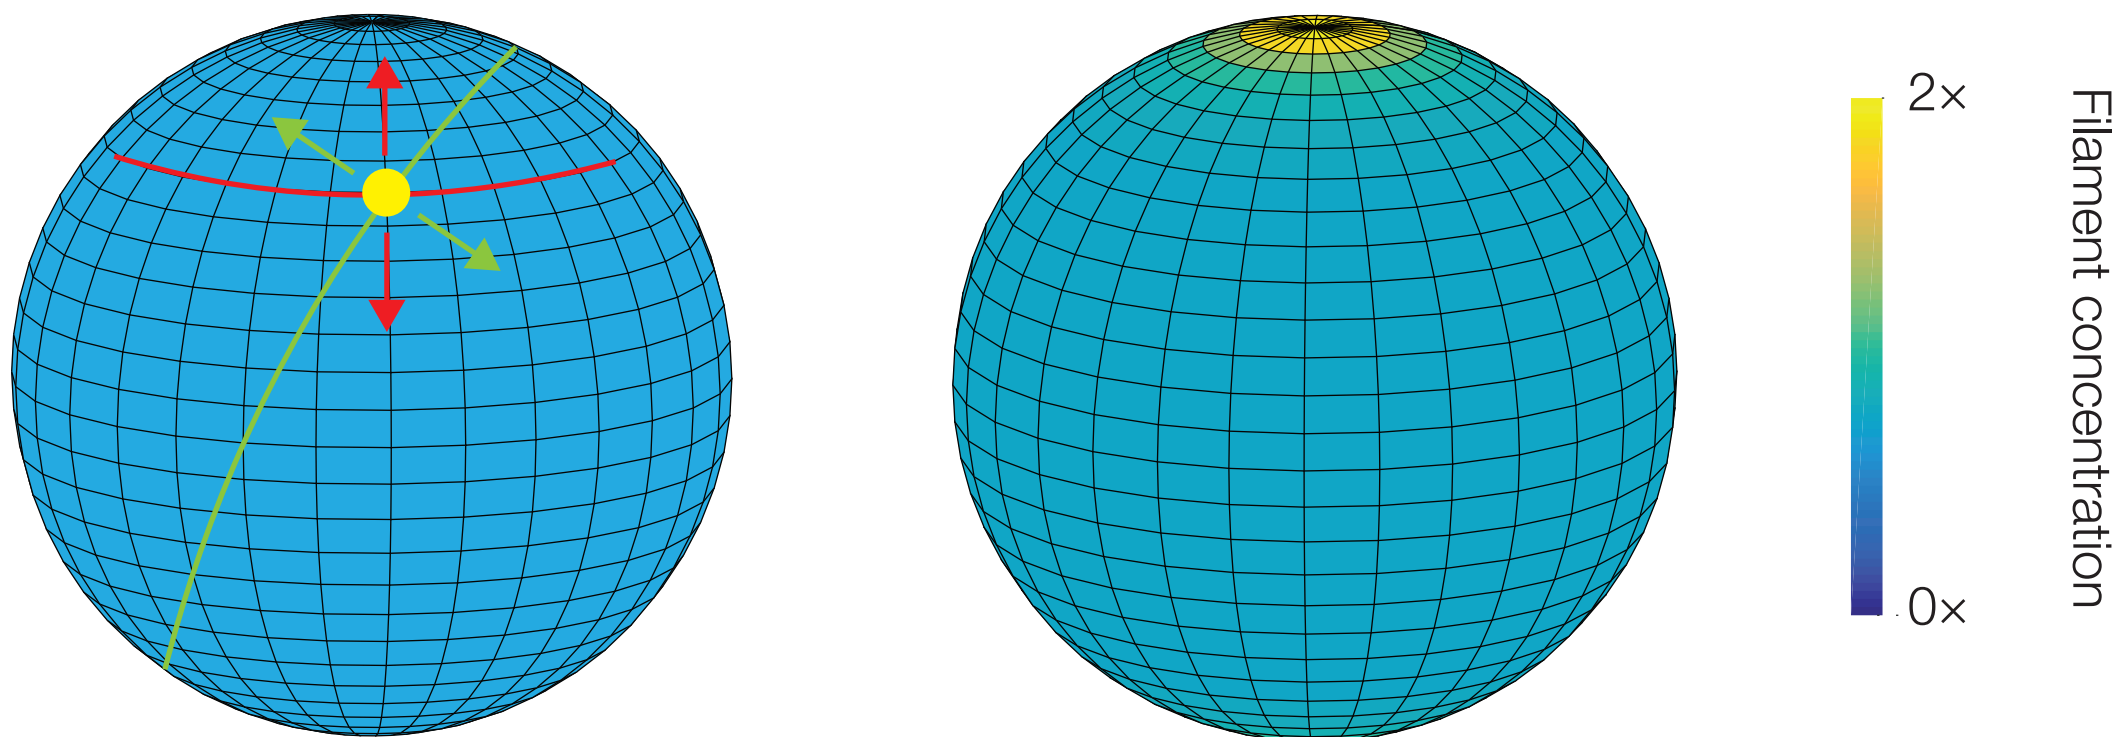

Supplement: supp [file elife-40472-supp-v1.zip]

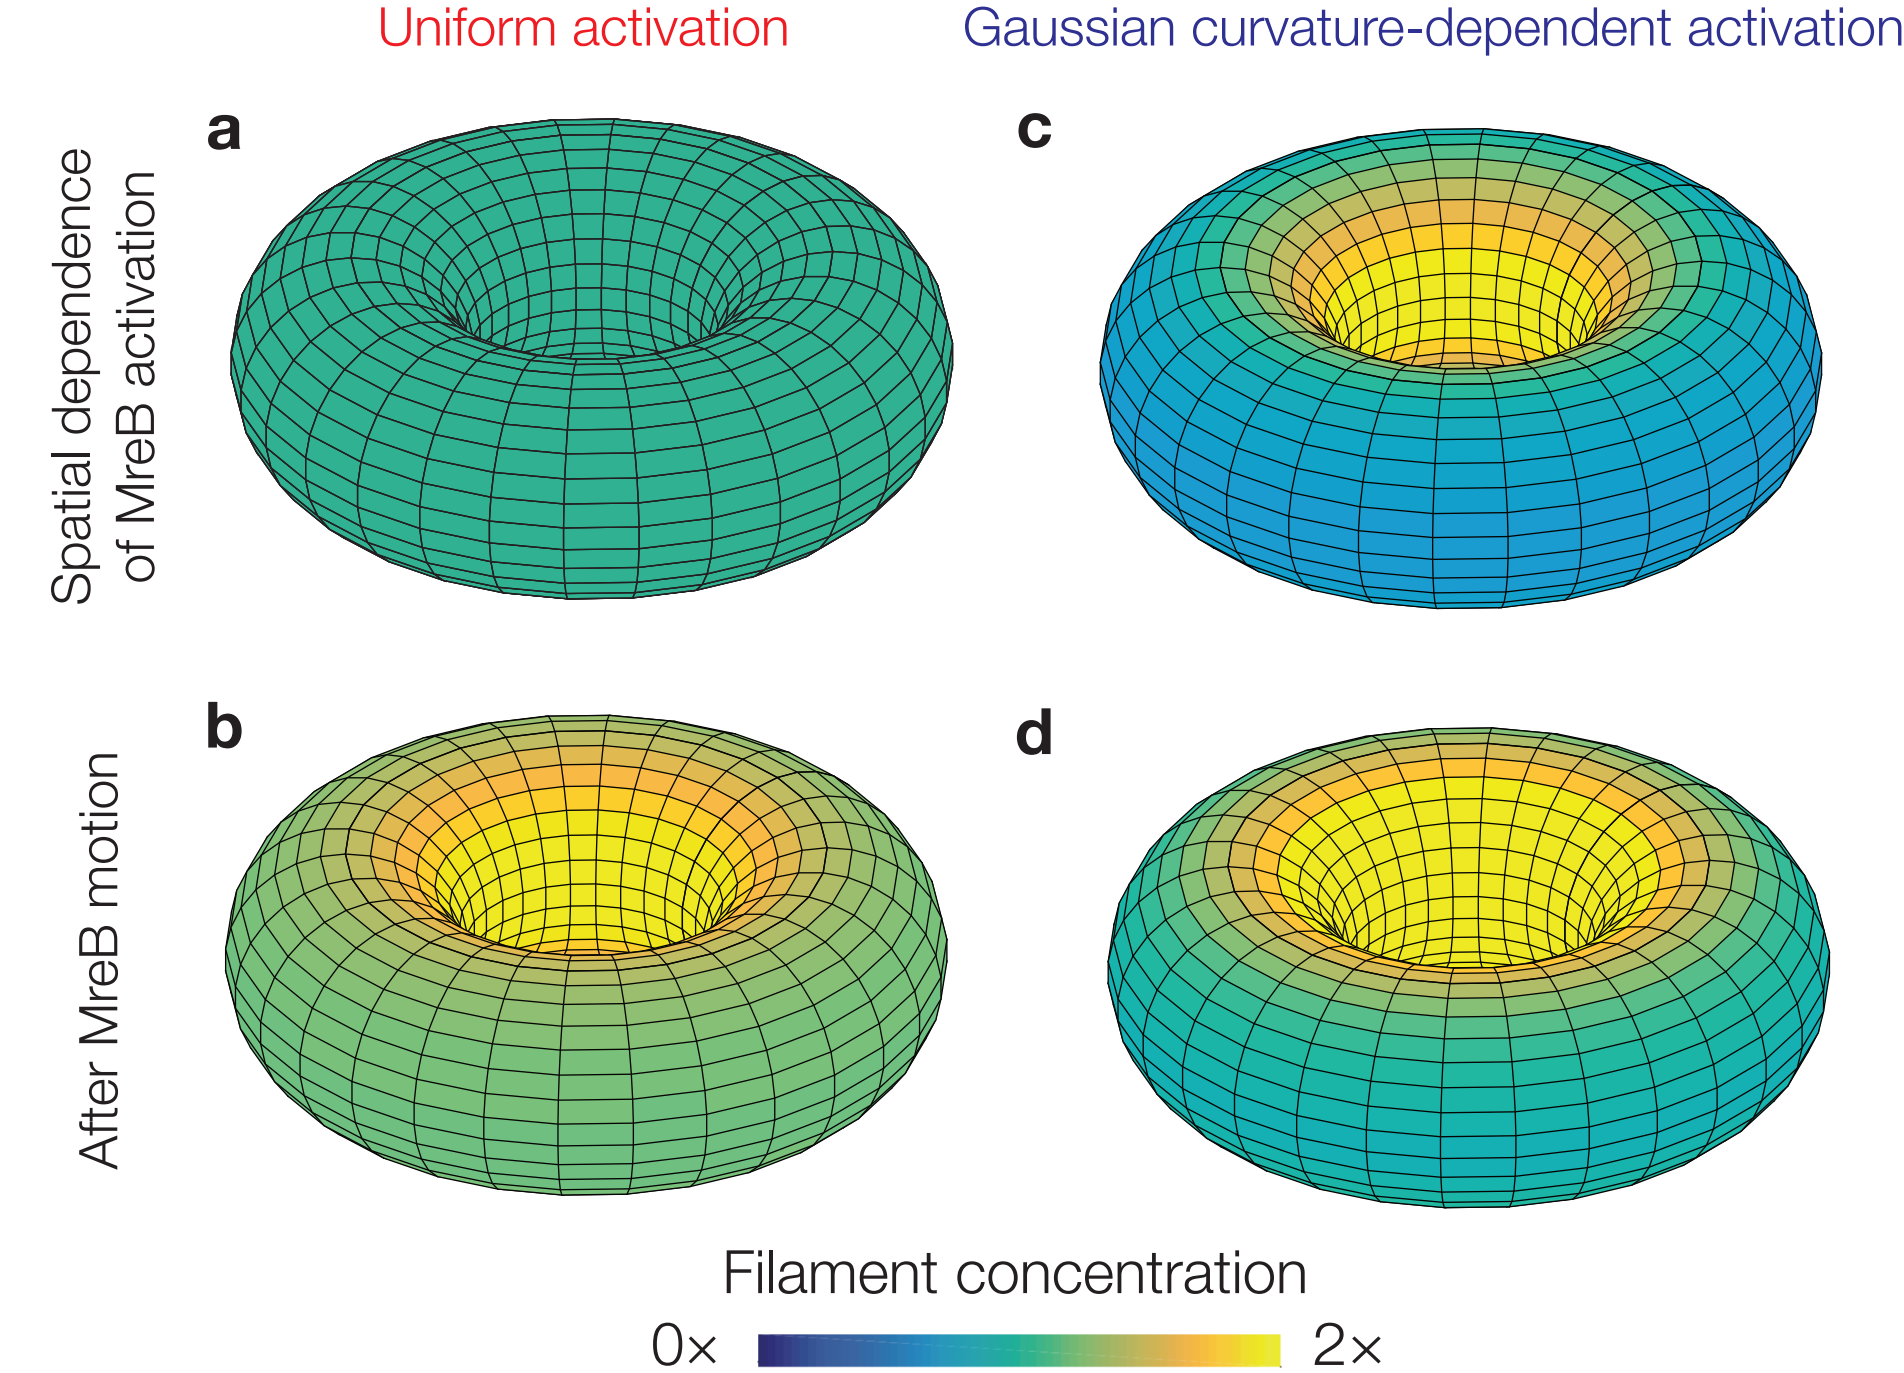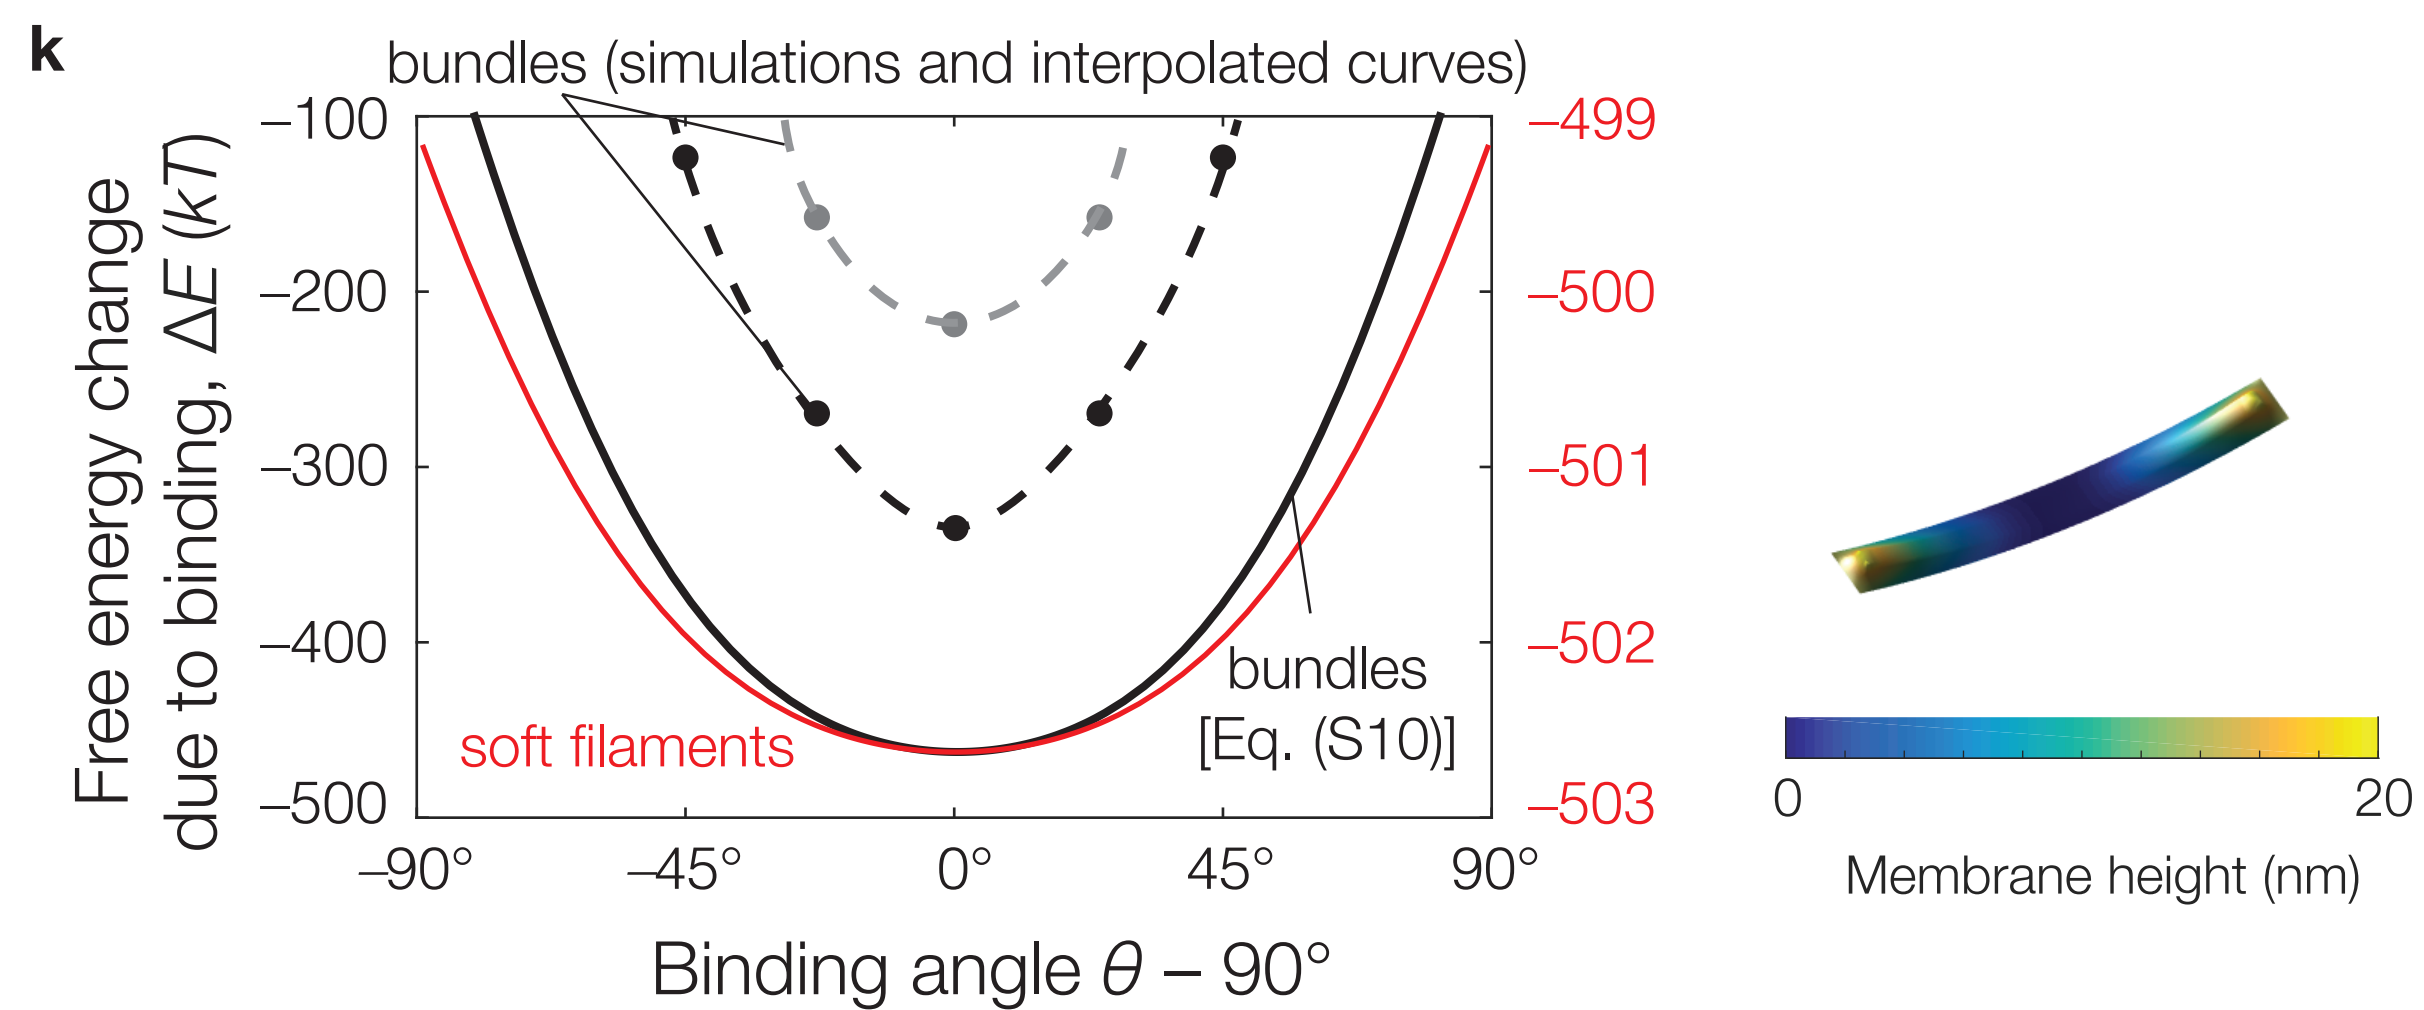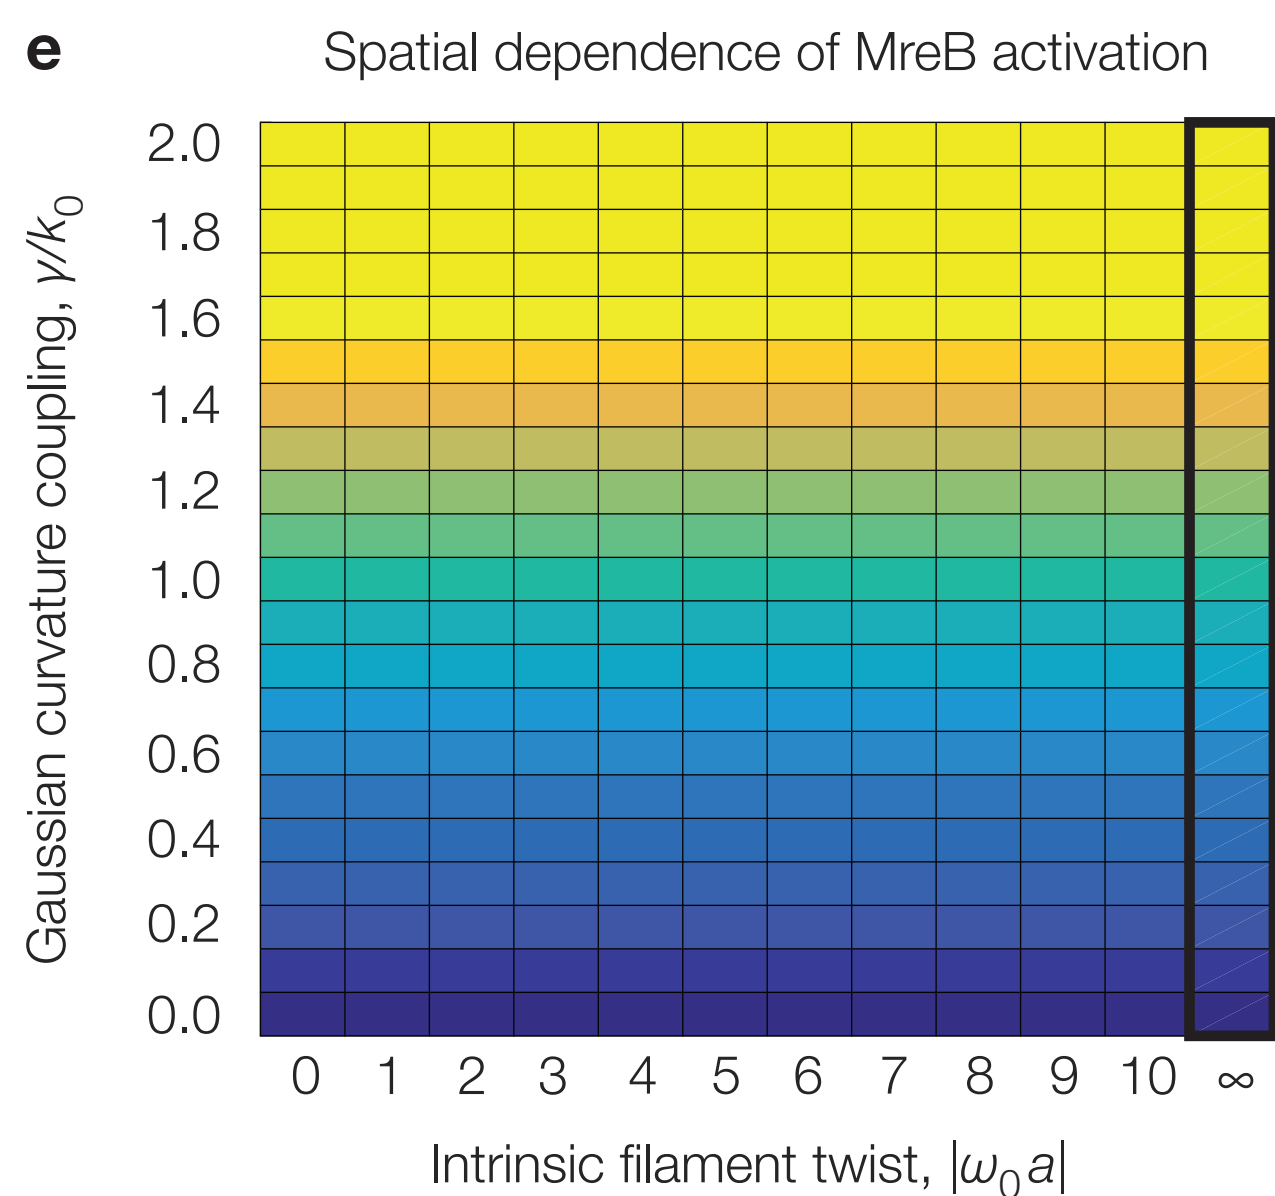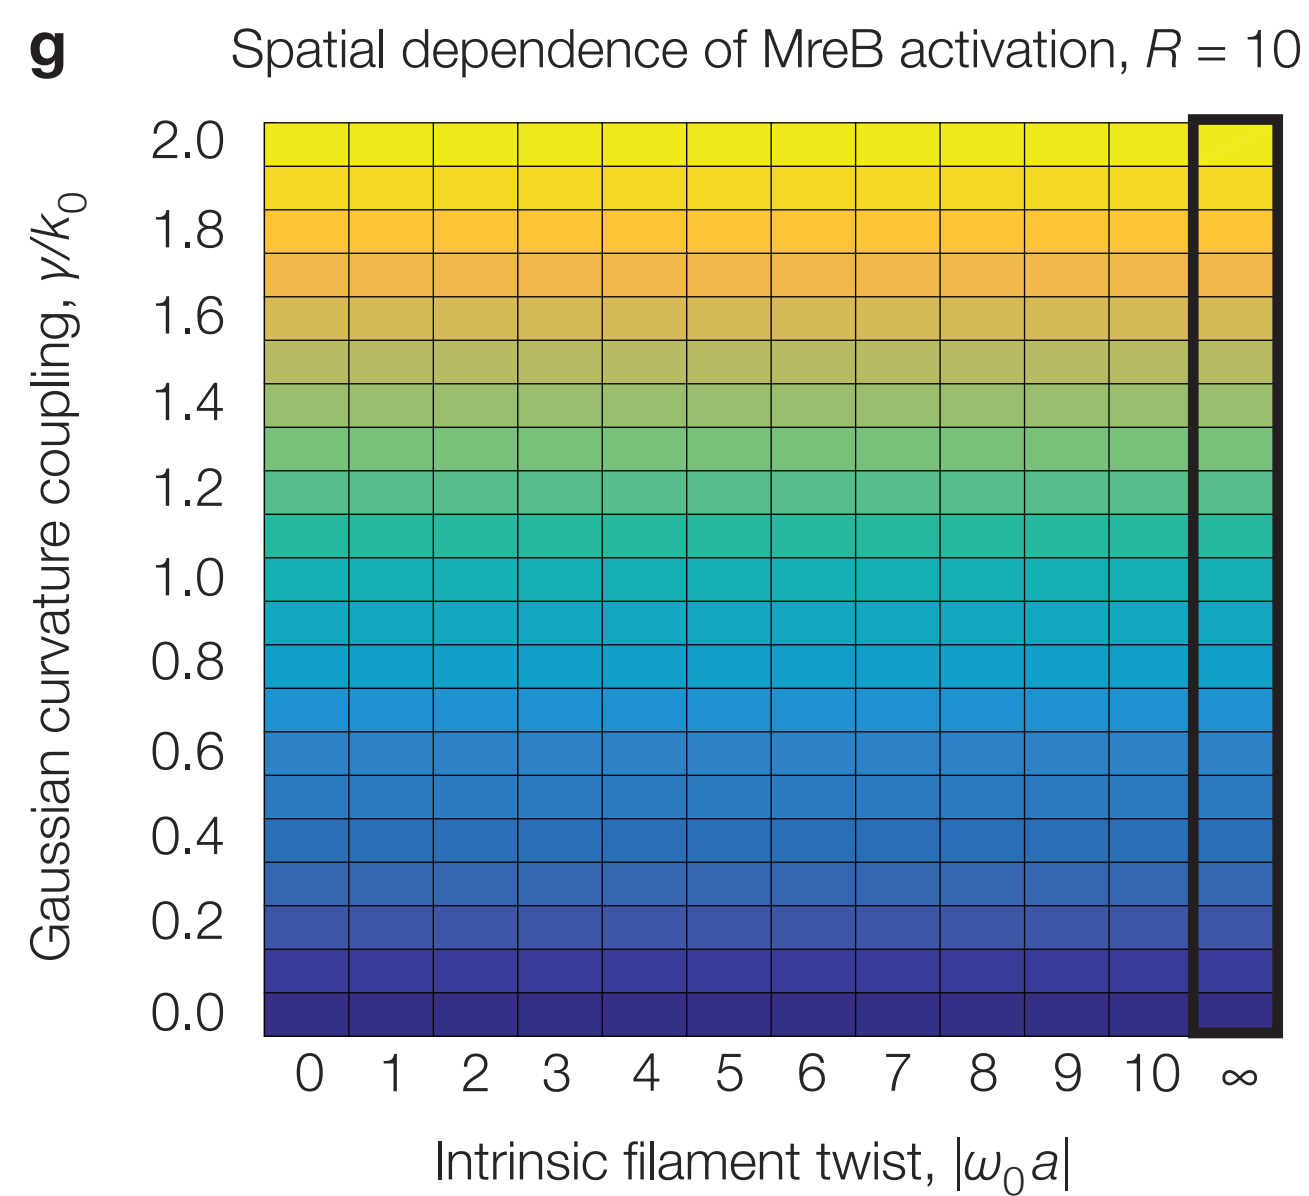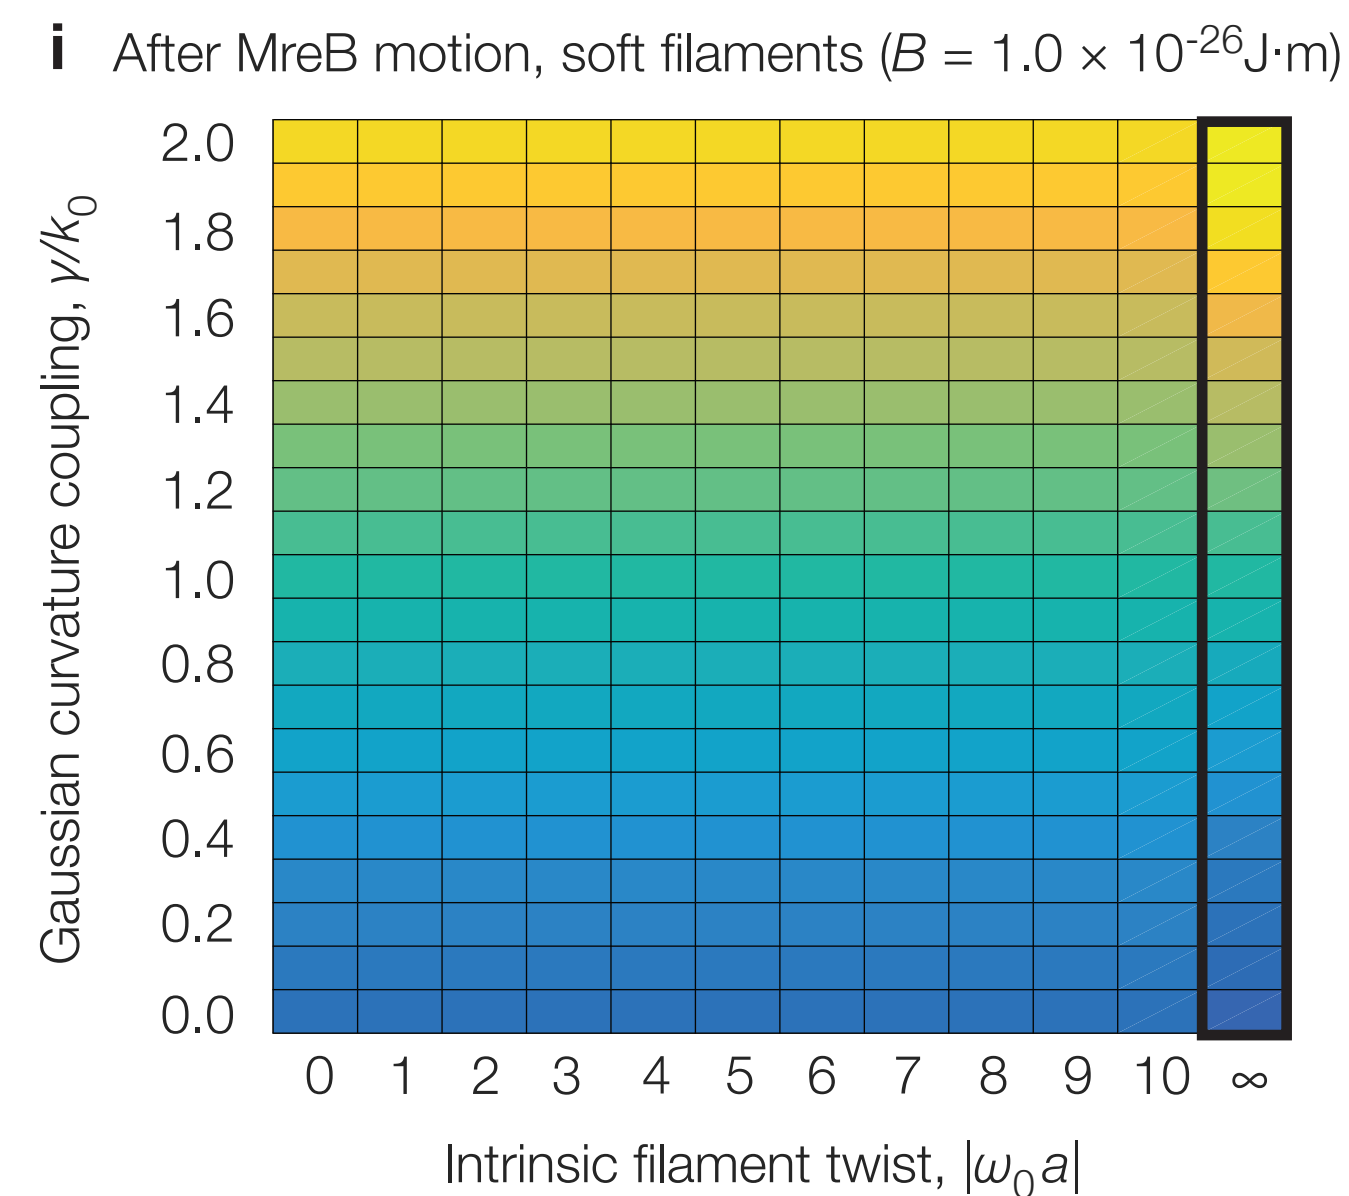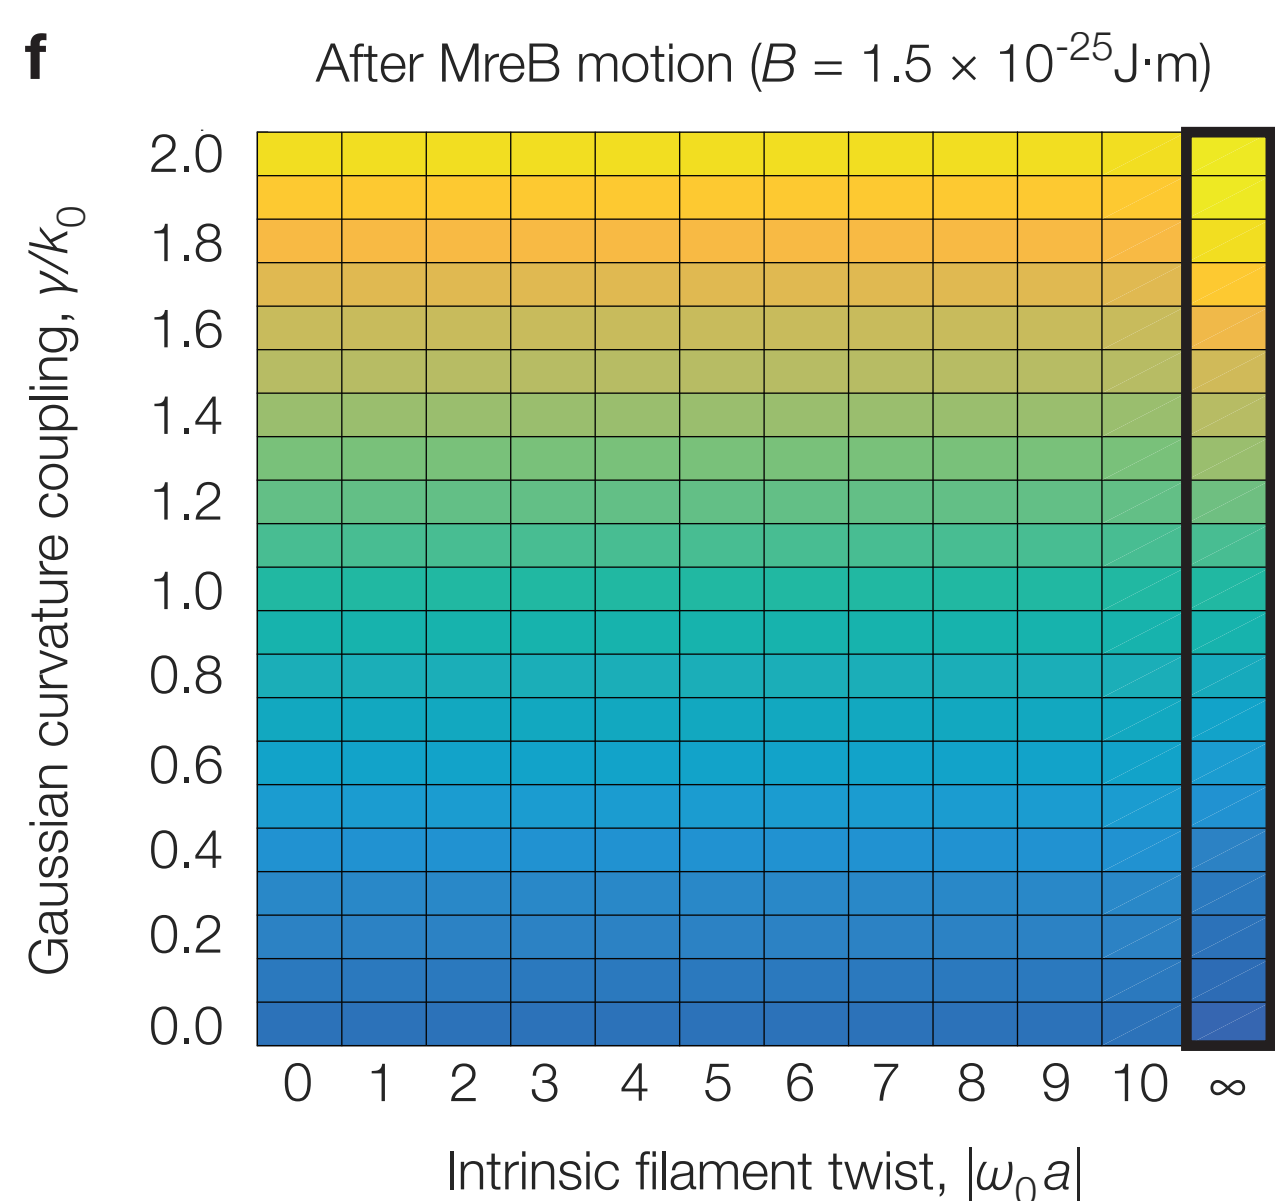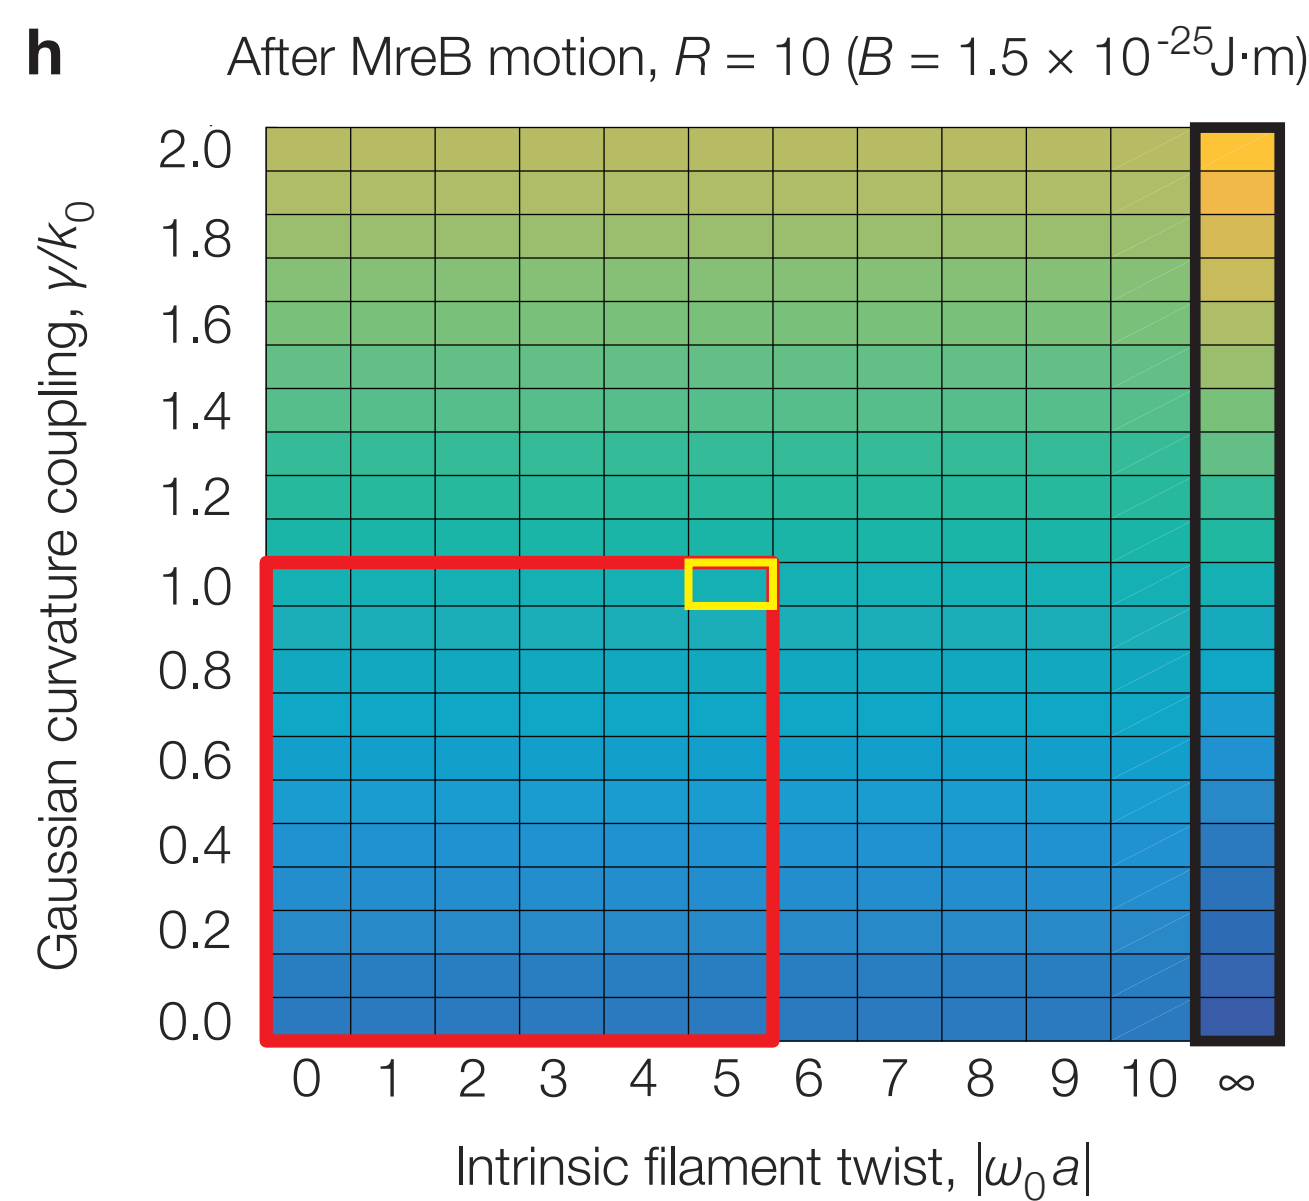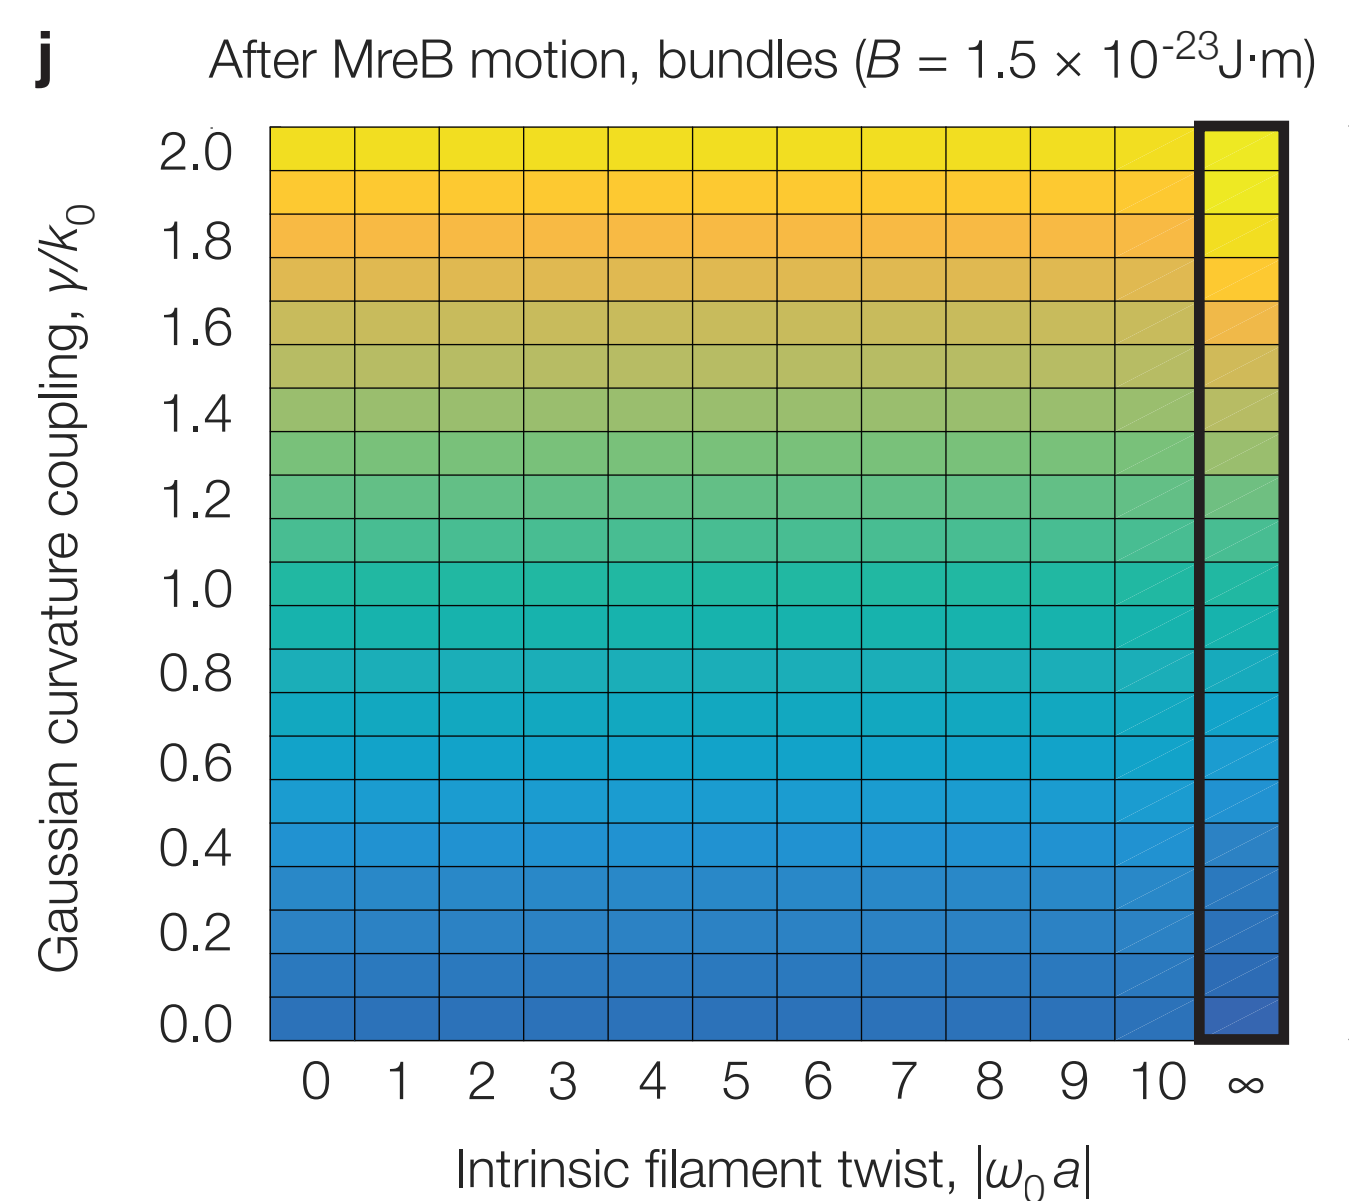

Supplement: supp [file elife-40472-supp-v1.zip]

**a**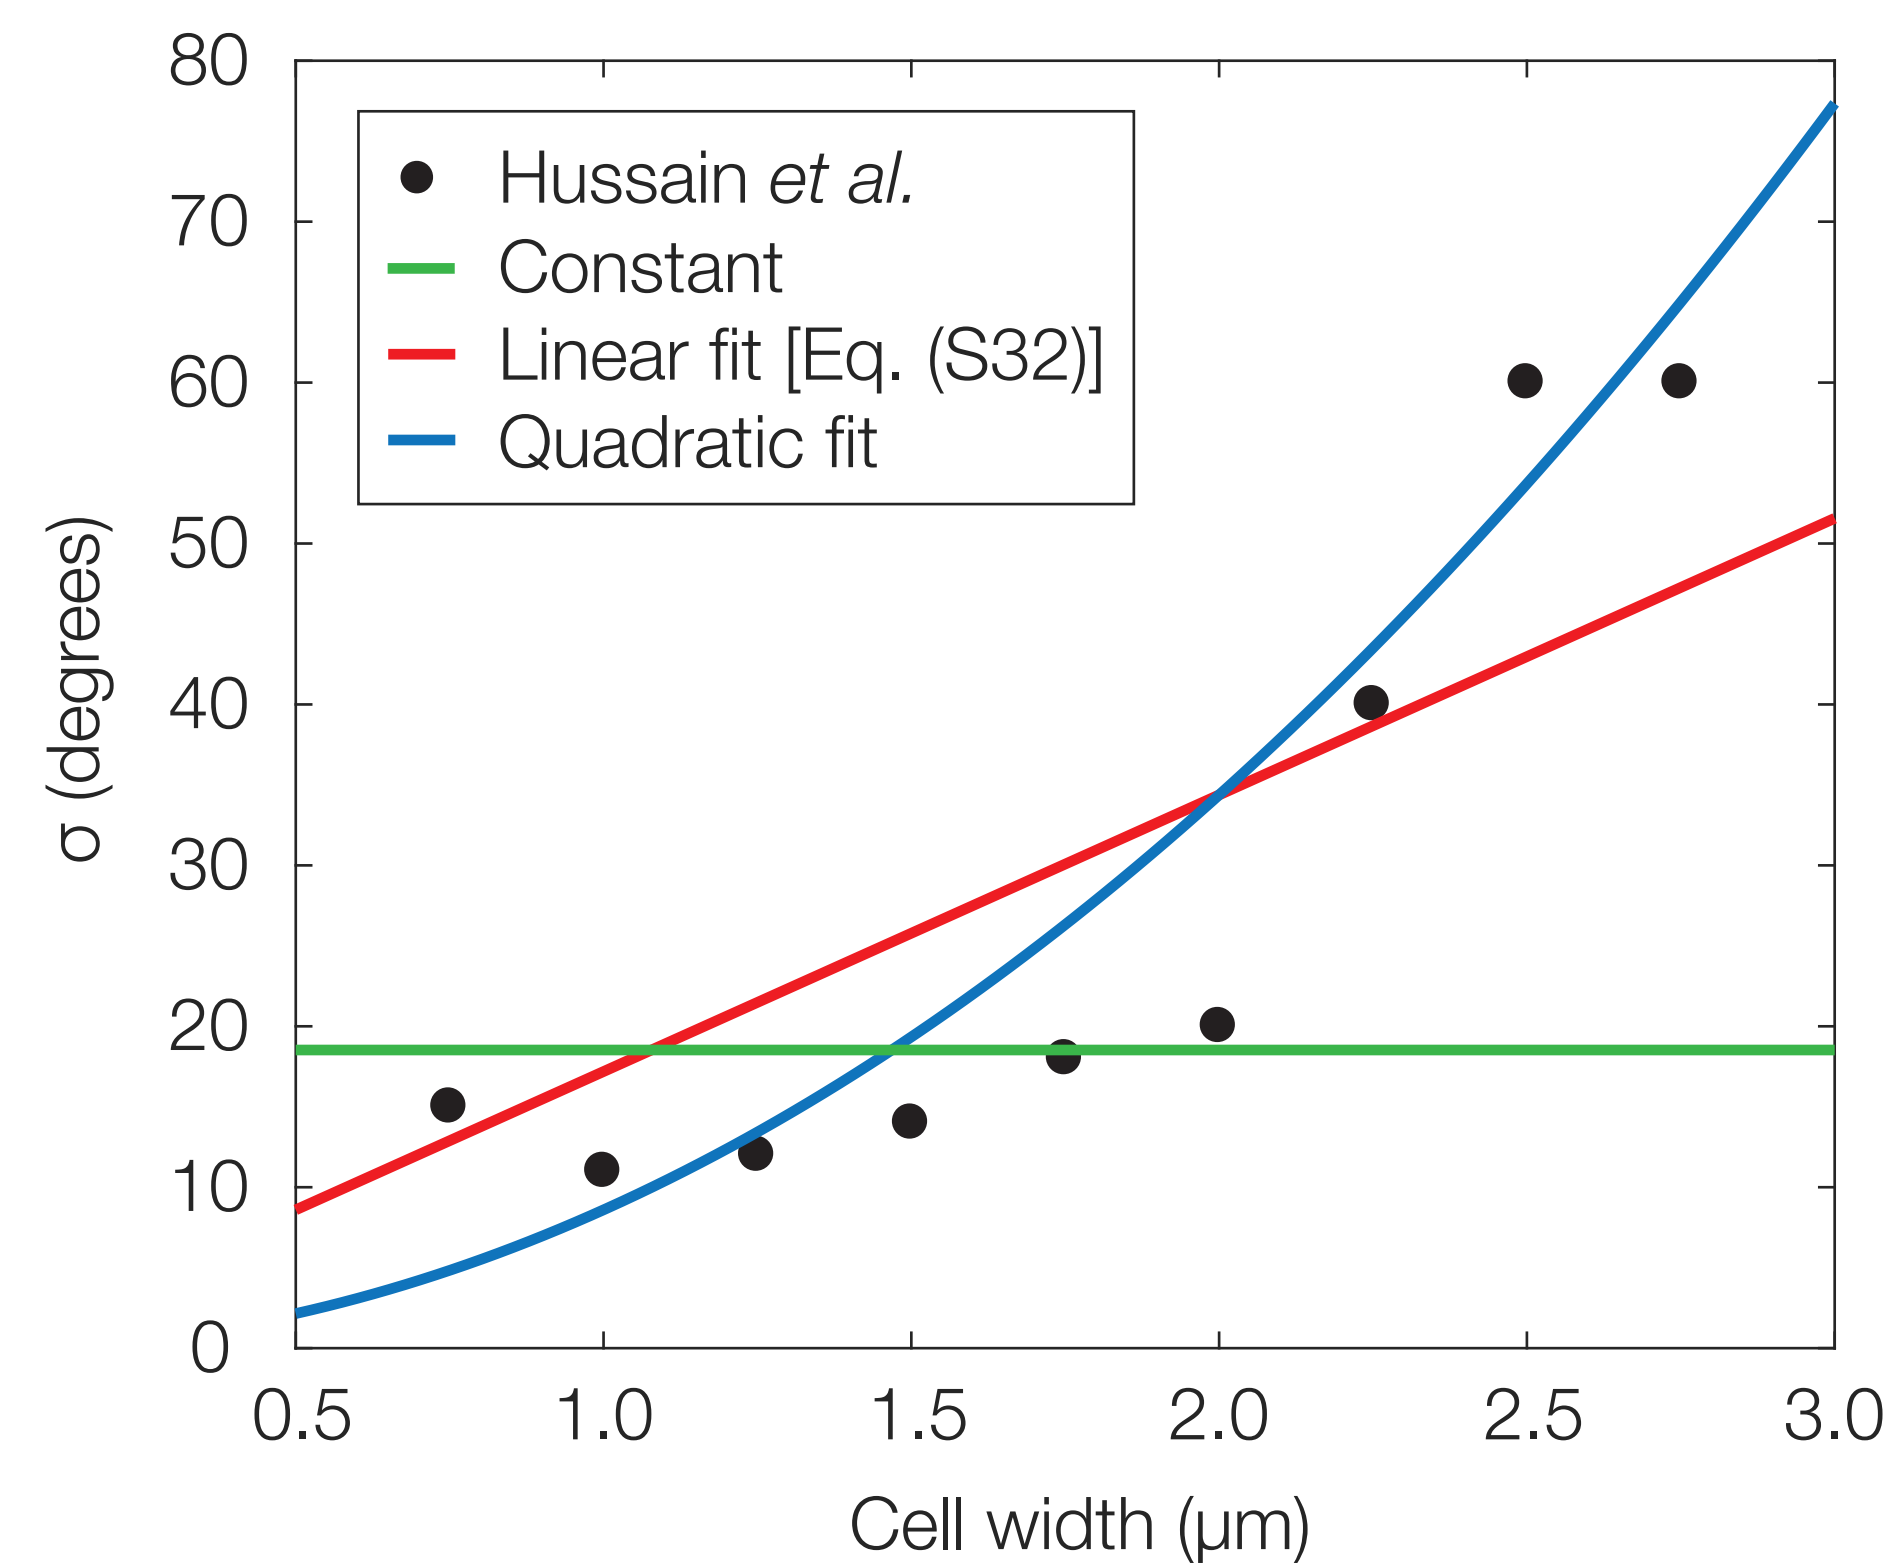**b**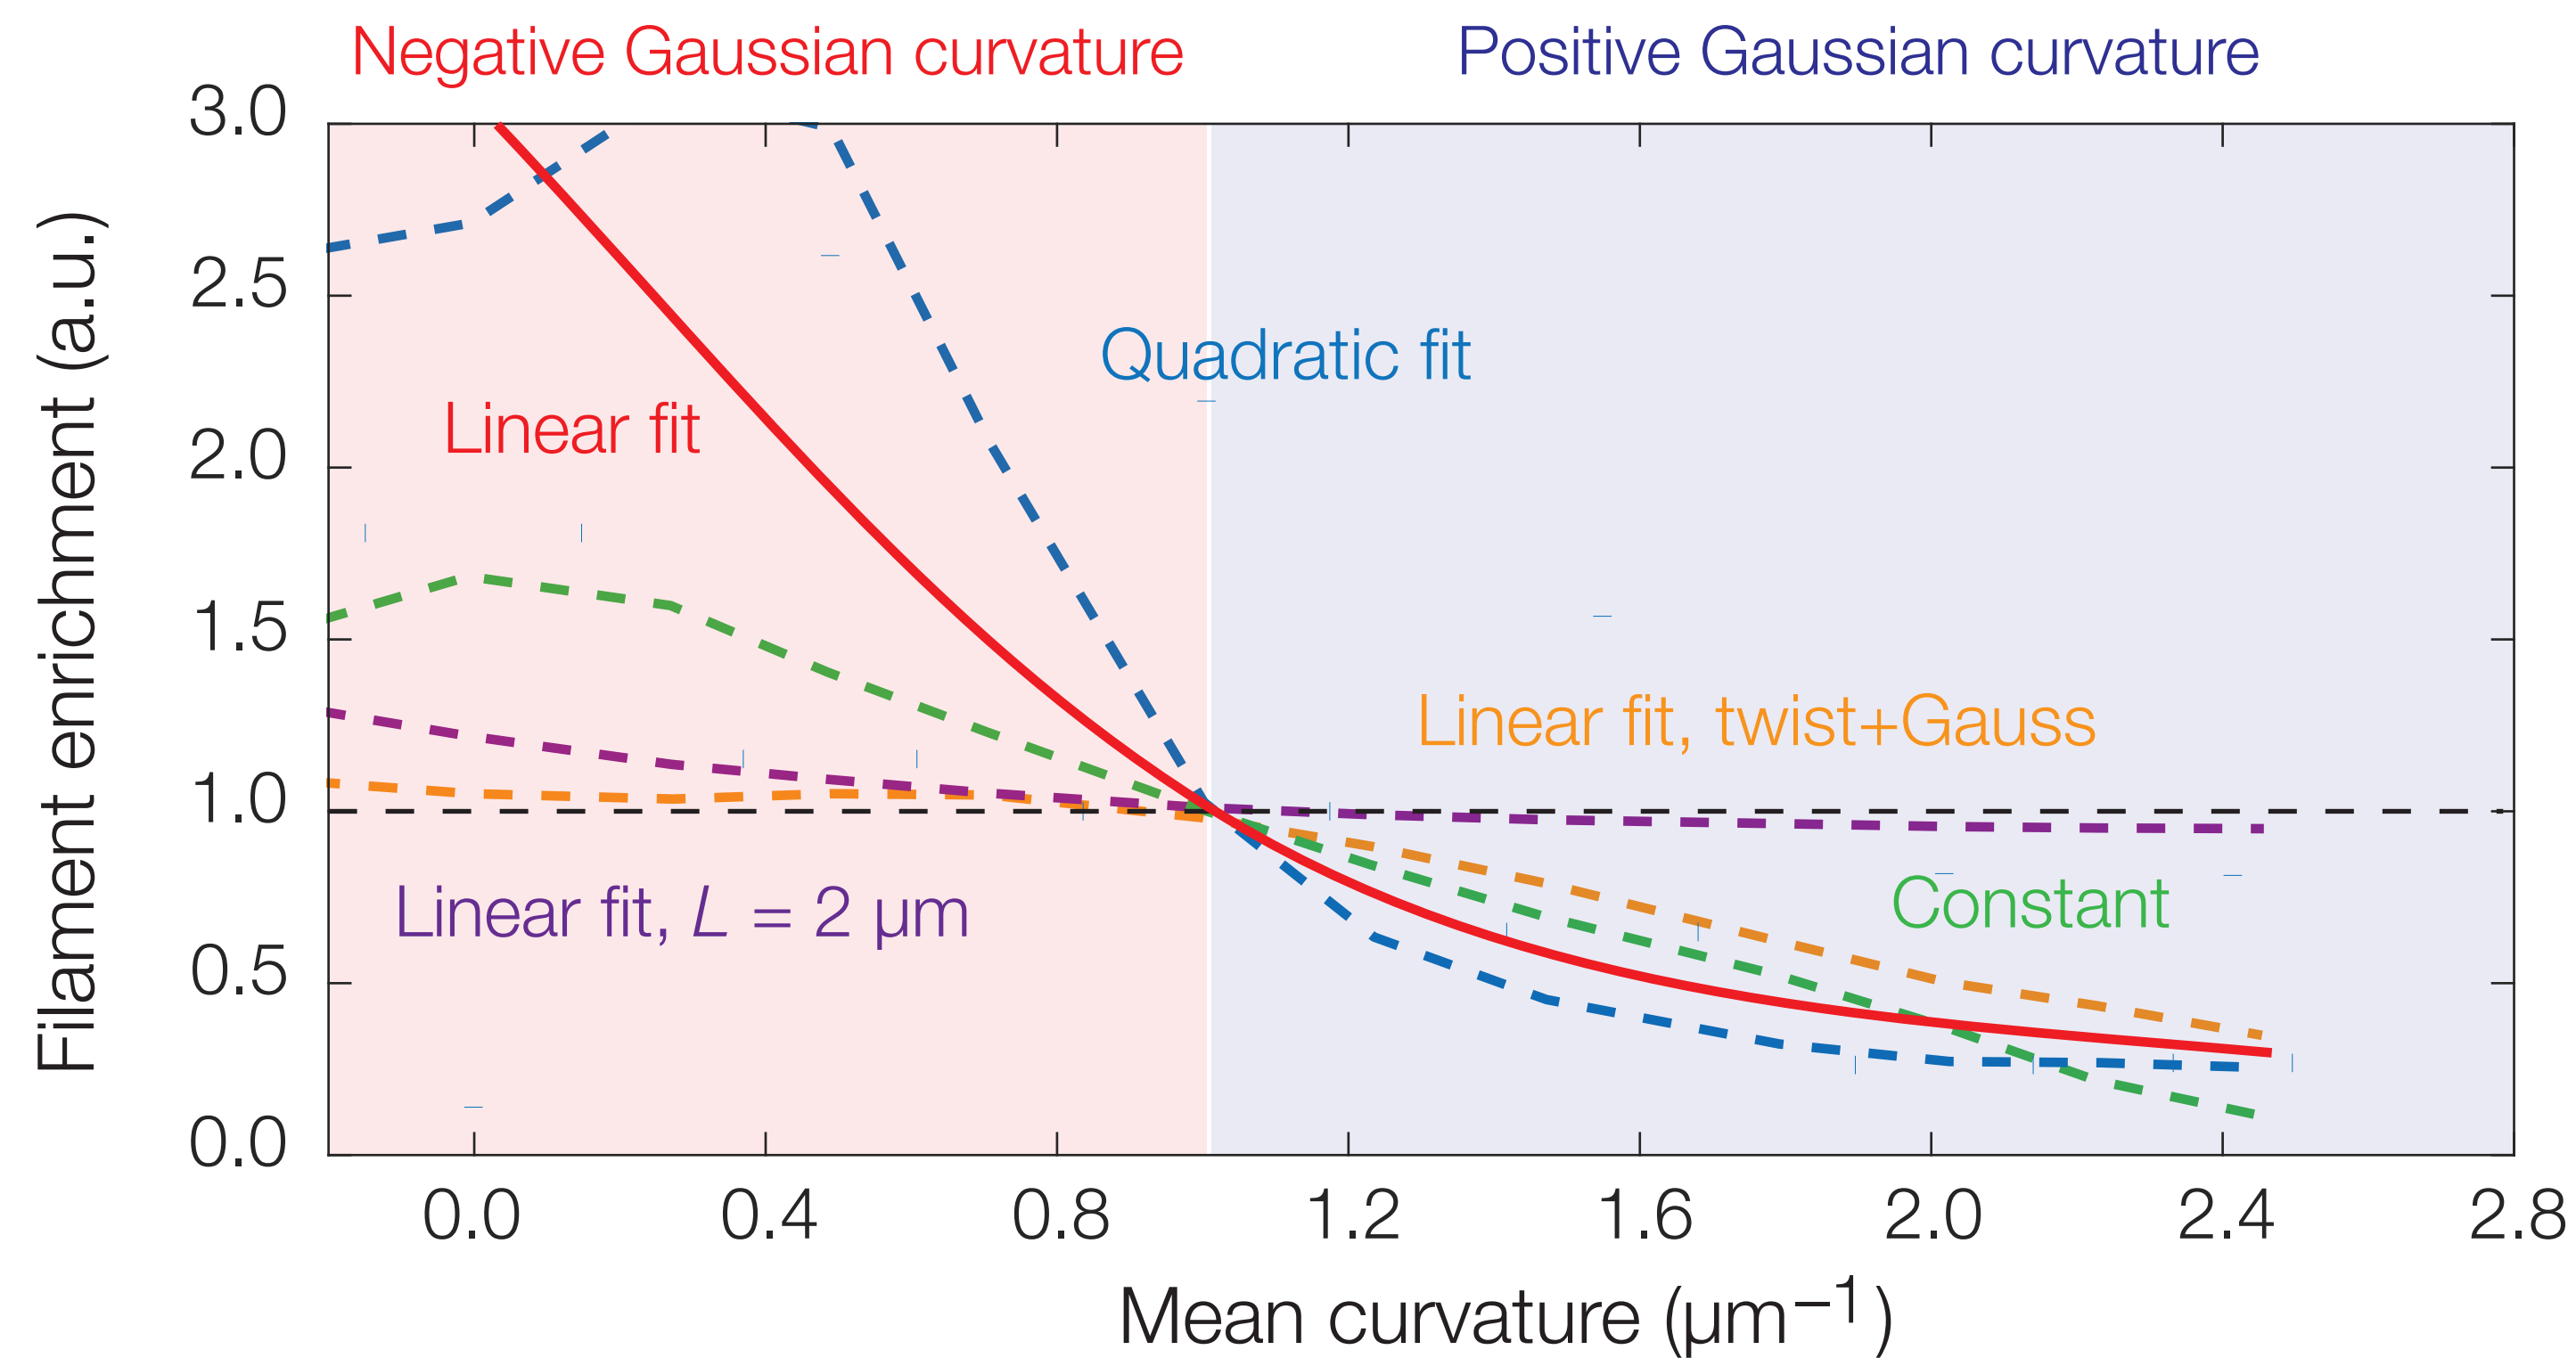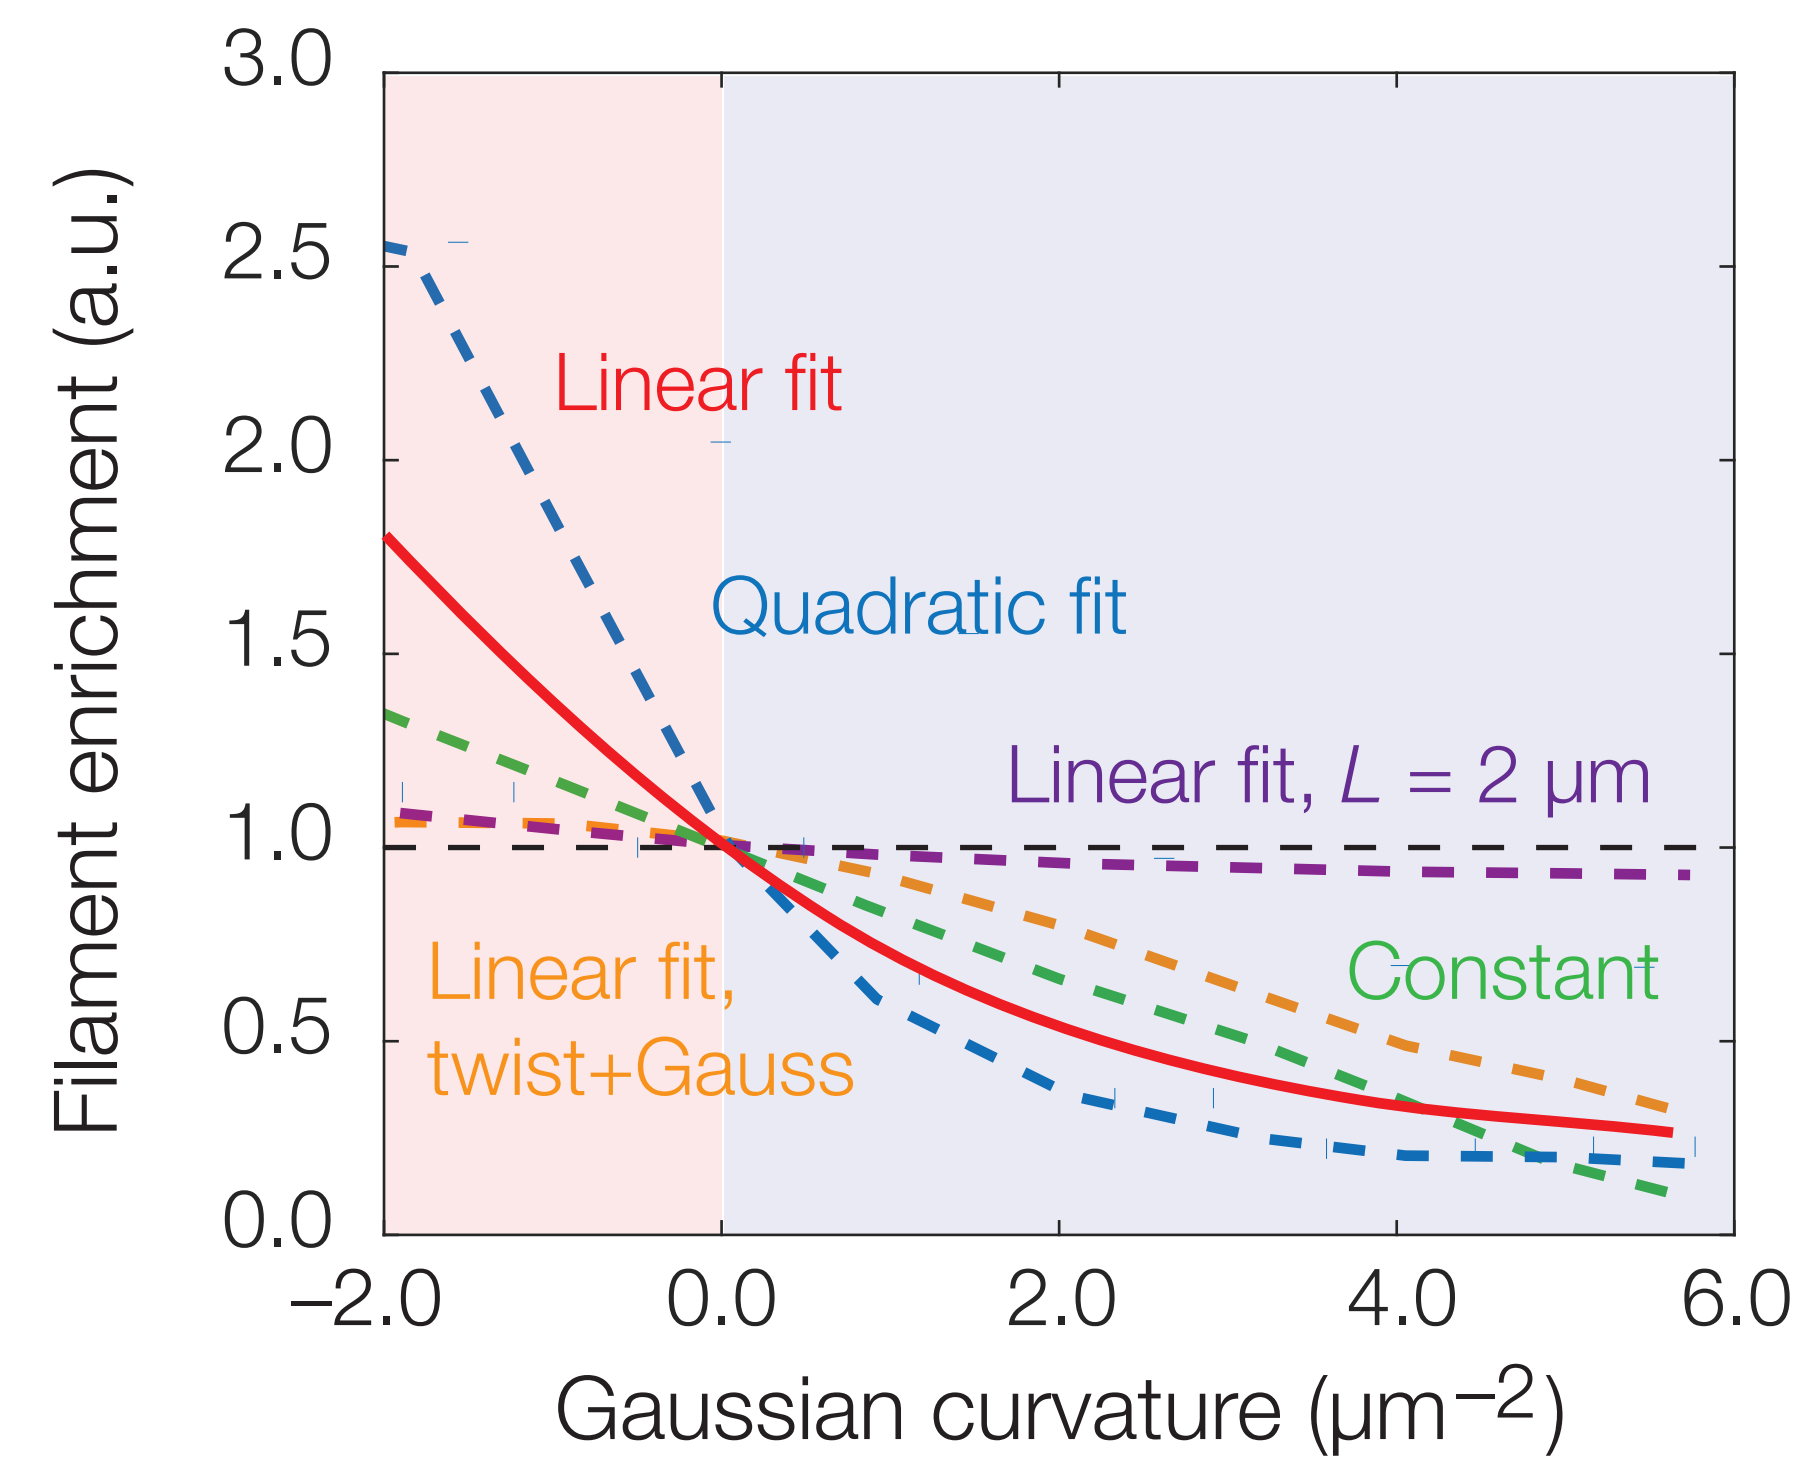

Supplement: supp [file elife-40472-supp-v1.zip]
